# Supplementary material
Source: publisher figshare collection journal article supplement (https://acs.figshare.com/ndownloader/files/4469371)
Supplement: Supplementary file 1 [file 4469371]

# **Limonoids and Triterpenoids from the Stem Bark of *Melia toosendan***

Yi Zhang, Chun-Ping Tang, Chang-Qiang Ke, Sheng Yao, and Yang Ye<sup>\*</sup>

*State Key Laboratory of Drug Research & Natural Products Chemistry Department,  
Shanghai Institute of Materia Medica, Chinese Academy of Sciences, 555  
Zu-Chong-Zhi Road, Zhangjiang Hi-Tech Park, Shanghai 201203, People's Republic  
of China*

<sup>\*</sup>To whom correspondence should be addressed. Tel: +86-21-50806726. Fax:  
+86-50806726. E-mail: yye@mail.shcnc.ac.cn

## List of content

The  $^1\text{H}$  NMR spectra were recorded at 300 MHz, 400 MHz and 600 MHz,  $^{13}\text{C}$  NMR spectra at 100 MHz, HMBC spectra at 400 MHz, and ROESY spectra at 600 MHz.

|      |     |                                                                                                          |
|------|-----|----------------------------------------------------------------------------------------------------------|
| P 4  | S1  | The $^1\text{H}$ NMR Spectrum of Compound <b>1</b> in $\text{CDCl}_3$                                    |
| P 4  | S2  | The $^{13}\text{C}$ NMR Spectrum of Compound <b>1</b> in $\text{CDCl}_3$                                 |
| P 5  | S3  | The HSQC NMR Spectrum of Compound <b>1</b> in $\text{CDCl}_3$                                            |
| P 5  | S4  | The HMBC NMR Spectrum of Compound <b>1</b> in $\text{CDCl}_3$                                            |
| P 6  | S5  | The ROESY NMR Spectrum of Compound <b>1</b> in $\text{CDCl}_3$                                           |
| P 6  | S6  | The $^1\text{H}$ NMR Spectrum of Compound <b>3</b> in $\text{CDCl}_3$                                    |
| P 7  | S7  | The $^{13}\text{C}$ NMR Spectrum of Compound <b>3</b> in $\text{CDCl}_3$                                 |
| P 7  | S8  | The HSQC NMR Spectrum of Compound <b>3</b> in $\text{CDCl}_3$                                            |
| P 8  | S9  | The HMBC NMR Spectrum of Compound <b>3</b> in $\text{CDCl}_3$                                            |
| P 8  | S10 | The ROESY NMR Spectrum of Compound <b>3</b> in $\text{CDCl}_3$                                           |
| P 9  | S11 | The $^1\text{H}$ NMR Spectrum of Compound <b>4</b> in $\text{C}_5\text{D}_5\text{N}$                     |
| P 9  | S12 | The $^{13}\text{C}$ NMR Spectrum of Compound <b>4</b> in $\text{C}_5\text{D}_5\text{N}$                  |
| P 10 | S13 | The HSQC NMR Spectrum of Compound <b>4</b> in $\text{C}_5\text{D}_5\text{N}$                             |
| P 10 | S14 | The $^1\text{H}$ - $^1\text{H}$ COSY NMR Spectrum of Compound <b>4</b> in $\text{C}_5\text{D}_5\text{N}$ |
| P 11 | S15 | The HMBC NMR Spectrum of Compound <b>4</b> in $\text{C}_5\text{D}_5\text{N}$                             |
| P 11 | S16 | The ROESY NMR Spectrum of Compound <b>4</b> in $\text{C}_5\text{D}_5\text{N}$                            |
| P 12 | S17 | The $^1\text{H}$ NMR Spectrum of Compound <b>6</b> in $\text{C}_5\text{D}_5\text{N}$                     |
| P 12 | S18 | The $^{13}\text{C}$ NMR Spectrum of Compound <b>6</b> in $\text{C}_5\text{D}_5\text{N}$                  |
| P 13 | S19 | The $^1\text{H}$ NMR Spectrum of Compound <b>8</b> in $\text{CDCl}_3$                                    |
| P 13 | S20 | The $^{13}\text{C}$ NMR Spectrum of Compound <b>8</b> in $\text{CDCl}_3$                                 |
| P 14 | S21 | The HSQC NMR Spectrum of Compound <b>8</b> in $\text{CDCl}_3$                                            |
| P 14 | S22 | The HMBC NMR Spectrum of Compound <b>8</b> in $\text{CDCl}_3$                                            |
| P 15 | S23 | The $^1\text{H}$ NMR Spectrum of Compound <b>9</b> in $\text{CDCl}_3$                                    |
| P 15 | S24 | The $^{13}\text{C}$ NMR Spectrum of Compound <b>9</b> in $\text{CDCl}_3$                                 |
| P 16 | S25 | The HSQC NMR Spectrum of Compound <b>9</b> in $\text{CDCl}_3$                                            |
| P 16 | S26 | The $^1\text{H}$ - $^1\text{H}$ COSY NMR Spectrum of Compound <b>9</b> in $\text{CDCl}_3$                |
| P17  | S27 | The HMBC NMR spectrum of compound <b>9</b> in $\text{CDCl}_3$                                            |
| P17  | S28 | The ROESY NMR spectrum of compound <b>9</b> in $\text{CDCl}_3$                                           |
| P 18 | S29 | The $^1\text{H}$ NMR Spectrum of Compound <b>10</b> in $\text{CDCl}_3$                                   |
| P 18 | S30 | The $^{13}\text{C}$ NMR Spectrum of Compound <b>10</b> in $\text{CDCl}_3$                                |
| P19  | S31 | The HSQC NMR Spectrum of Compound <b>10</b> in $\text{CDCl}_3$                                           |
| P19  | S32 | The $^1\text{H}$ - $^1\text{H}$ COSY NMR Spectrum of Compound <b>10</b> in $\text{CDCl}_3$               |
| P20  | S33 | The HMBC NMR Spectrum of Compound <b>10</b> in $\text{CDCl}_3$                                           |
| P20  | S34 | The ROESY NMR Spectrum of Compound <b>10</b> in $\text{CDCl}_3$                                          |

|     |     |                                                                                                                               |
|-----|-----|-------------------------------------------------------------------------------------------------------------------------------|
| P21 | S35 | The $^1\text{H}$ NMR Spectrum of Compound <b>11</b> in $\text{CDCl}_3$                                                        |
| P21 | S36 | The $^{13}\text{C}$ NMR Spectrum of Compound <b>11</b> in $\text{CDCl}_3$                                                     |
| P22 | S37 | The $^1\text{H}$ NMR Spectrum of Compound <b>12</b> in $\text{CDCl}_3$                                                        |
| P22 | S38 | The $^{13}\text{C}$ NMR Spectrum of Compound <b>12</b> in $\text{CDCl}_3$                                                     |
| P23 | S39 | The HSQC NMR Spectrum of Compound <b>12</b> in $\text{CDCl}_3$                                                                |
| P23 | S40 | The $^1\text{H}$ - $^1\text{H}$ COSY NMR Spectrum of Compound <b>12</b> in $\text{CDCl}_3$                                    |
| P24 | S41 | The HMBC NMR Spectrum of Compound <b>12</b> in $\text{CDCl}_3$                                                                |
| P24 | S42 | The ROESY NMR Spectrum of Compound <b>12</b> in $\text{CDCl}_3$                                                               |
| P25 | S43 | The $^1\text{H}$ NMR Spectrum of Compound <b>13</b> in $\text{CDCl}_3$                                                        |
| P25 | S44 | The $^{13}\text{C}$ NMR Spectrum of Compound <b>13</b> in $\text{CDCl}_3$                                                     |
| P26 | S45 | The HSQC NMR Spectrum of Compound <b>13</b> in $\text{CDCl}_3$                                                                |
| P26 | S46 | The $^1\text{H}$ - $^1\text{H}$ COSY NMR Spectrum of Compound <b>13</b> in $\text{CDCl}_3$                                    |
| P27 | S47 | The HMBC NMR Spectrum of Compound <b>13</b> in $\text{CDCl}_3$                                                                |
| P27 | S48 | The ROESY NMR Spectrum of Compound <b>13</b> in $\text{CDCl}_3$                                                               |
| P28 | S49 | The $^1\text{H}$ NMR Spectrum of Compound <b>14</b> in $\text{CDCl}_3$                                                        |
| P28 | S50 | The $^{13}\text{C}$ NMR Spectrum of Compound <b>14</b> in $\text{CDCl}_3$                                                     |
| P29 | S51 | The HSQC NMR Spectrum of Compound <b>14</b> in $\text{CDCl}_3$                                                                |
| P29 | S52 | The HMBC NMR Spectrum of Compound <b>14</b> in $\text{CDCl}_3$                                                                |
| P30 | S53 | The ROESY NMR Spectrum of Compound <b>14</b> in $\text{CDCl}_3$                                                               |
| P30 | S54 | The $^1\text{H}$ NMR Spectrum of Compound <b>15</b> in $\text{CDCl}_3$                                                        |
| P31 | S55 | The $^{13}\text{C}$ NMR Spectrum of Compound <b>15</b> in $\text{CDCl}_3$                                                     |
| P31 | S56 | The $^1\text{H}$ NMR Spectrum of Compound <b>5</b> in $\text{C}_5\text{D}_5\text{N}$                                          |
| P32 | S57 | The $^{13}\text{C}$ NMR Spectrum of Compound <b>5</b> in $\text{C}_5\text{D}_5\text{N}$                                       |
| P33 |     | Figure 1 Key HMBC and ROESY correlations for compounds <b>1</b> and <b>3</b>                                                  |
| P33 |     | Figure 2 Key HMBC correlations for compounds <b>4</b> , <b>8</b> , <b>9</b> , <b>10</b> , <b>12</b> , <b>13</b> and <b>14</b> |
| P34 |     | Figure 3 Key ROESY correlations for compounds <b>9</b> , <b>12</b> , <b>13</b> and <b>14</b>                                  |
| P34 |     | Figure 4 Known compounds from <i>Melia toosendan</i>                                                                          |

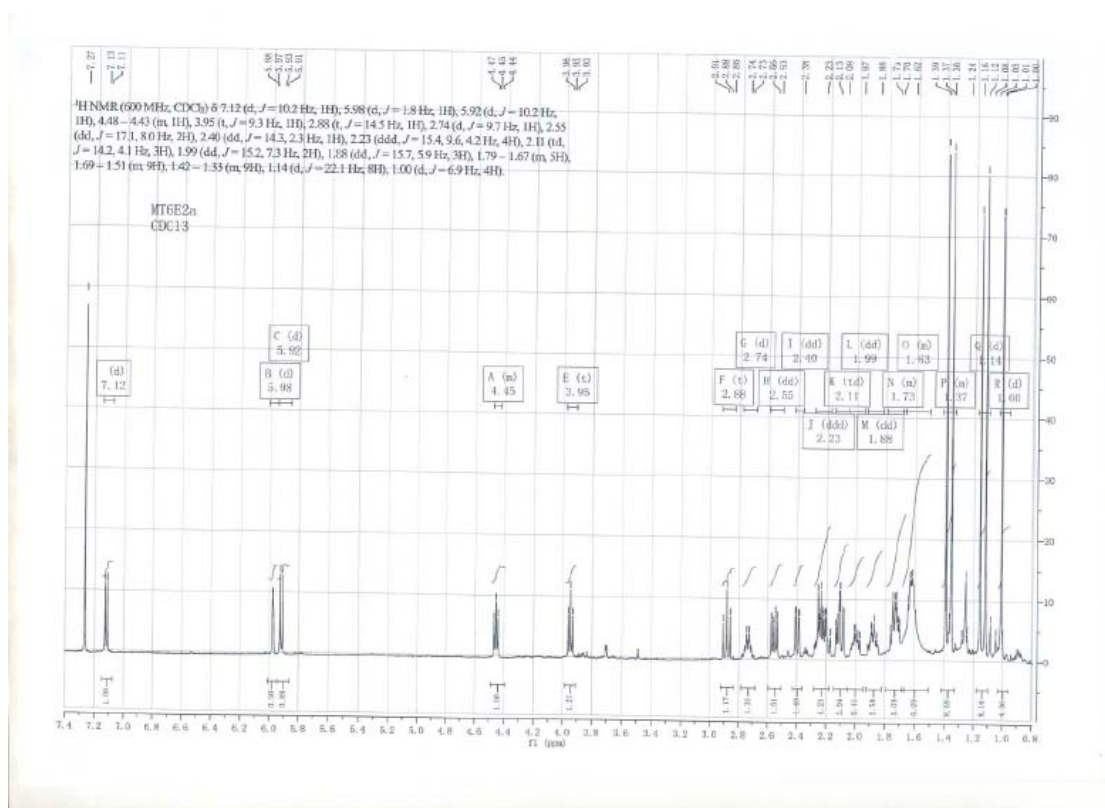

S1. The <sup>1</sup>H NMR Spectrum of Compound 1 in CDCl<sub>3</sub>

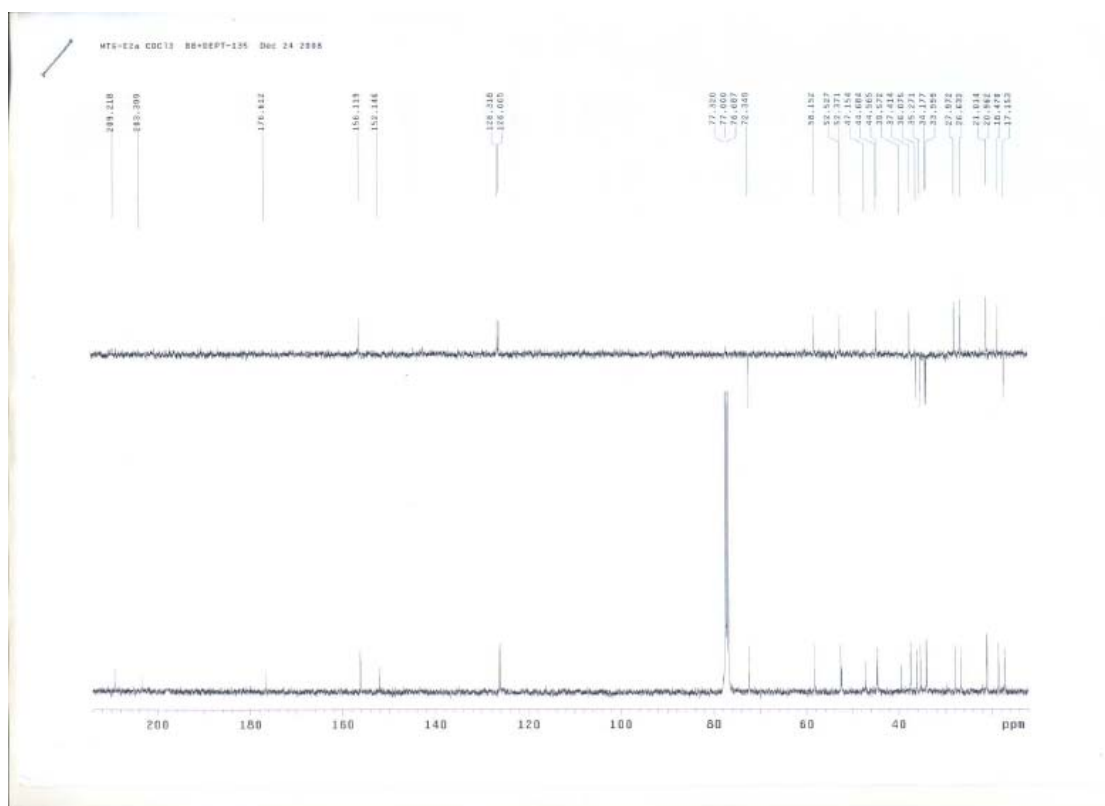

S2. The <sup>13</sup>C NMR Spectrum of Compound 1 in CDCl<sub>3</sub>

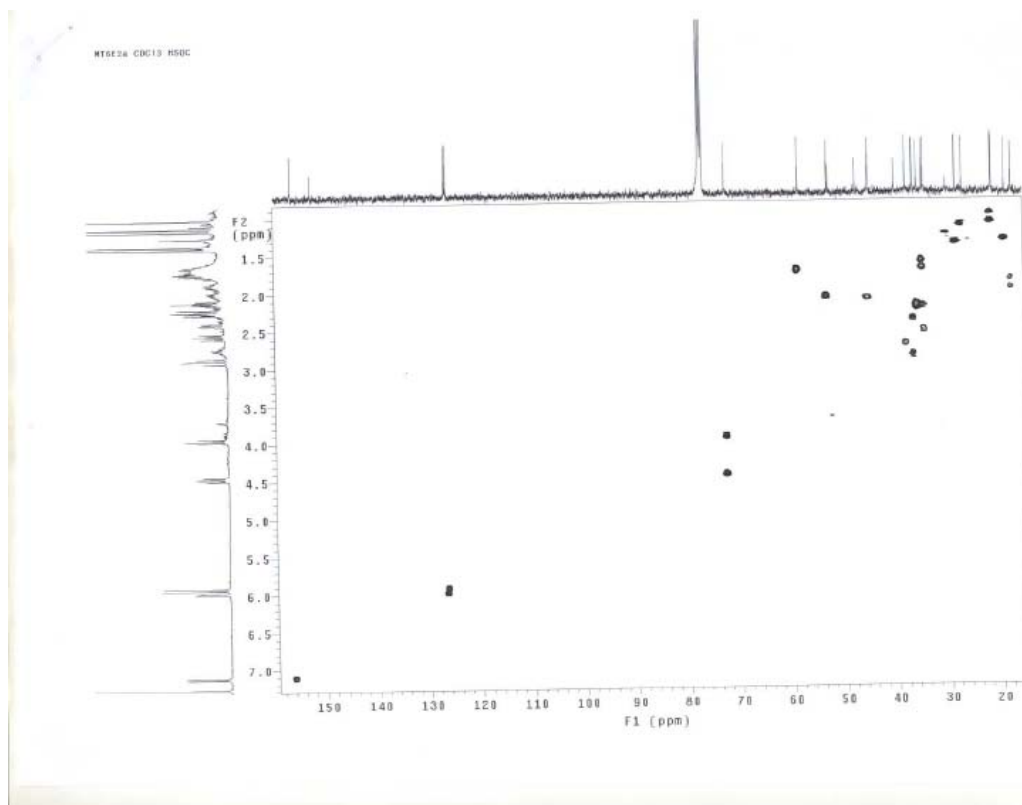

**S3. The HSQC NMR Spectrum of Compound 1 in  $\text{CDCl}_3$**

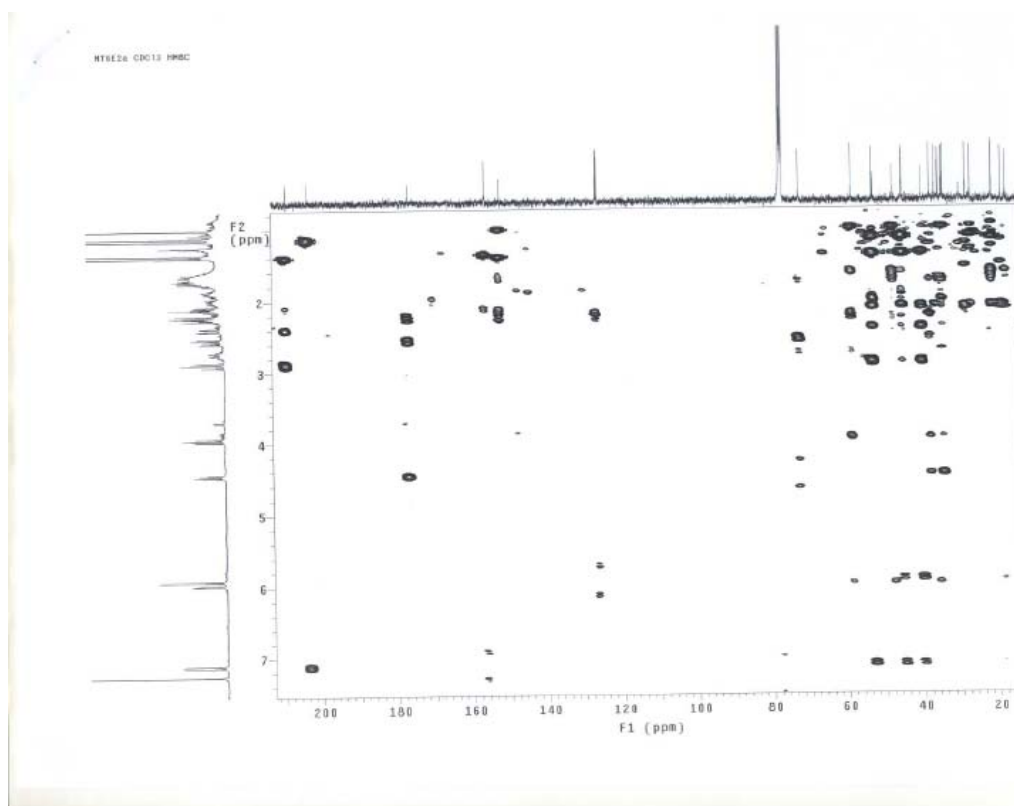

**S4. The HMBC NMR Spectrum of Compound 1 in  $\text{CDCl}_3$**

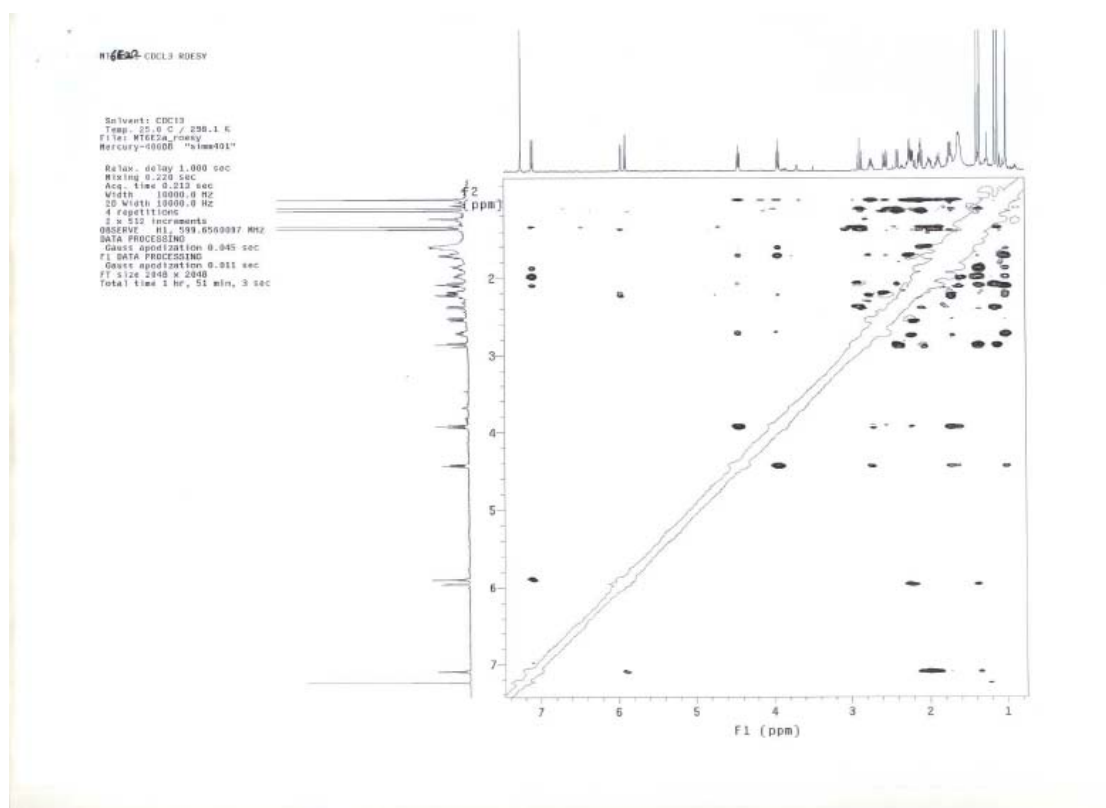

**S5. The ROESY NMR Spectrum of Compound 1 in CDCl<sub>3</sub>**

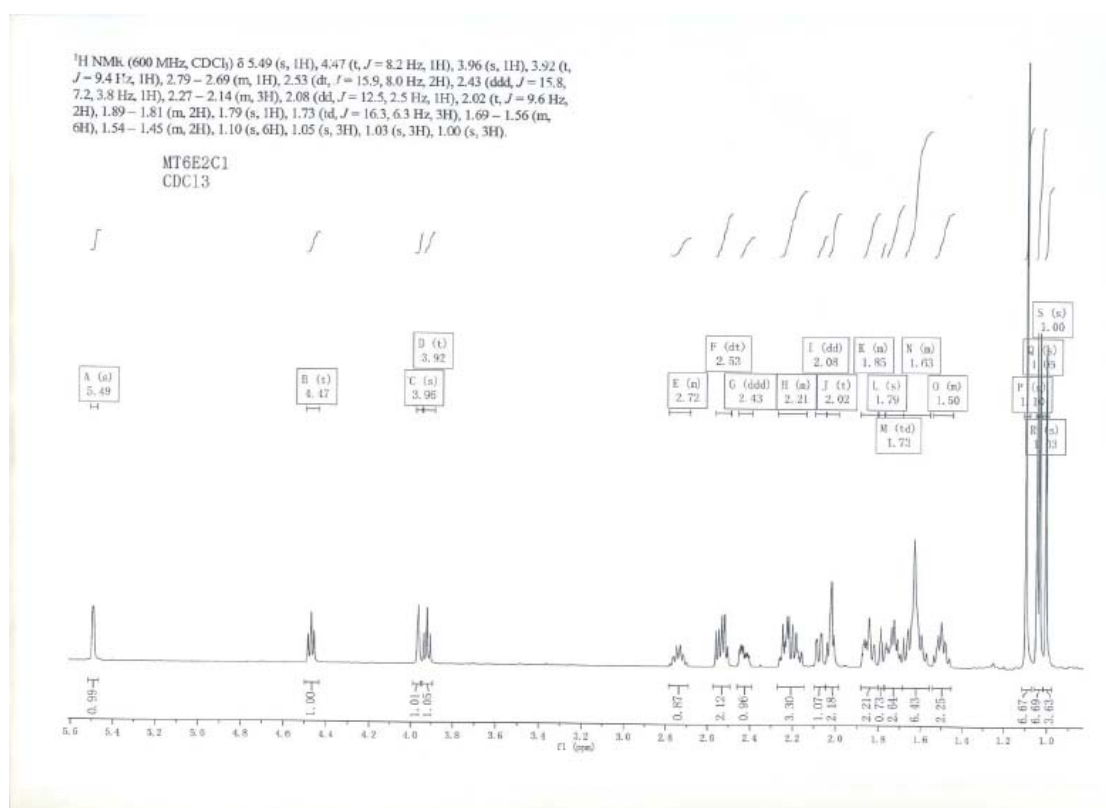

**S6. The <sup>1</sup>H NMR Spectrum of Compound 3 in CDCl<sub>3</sub>**

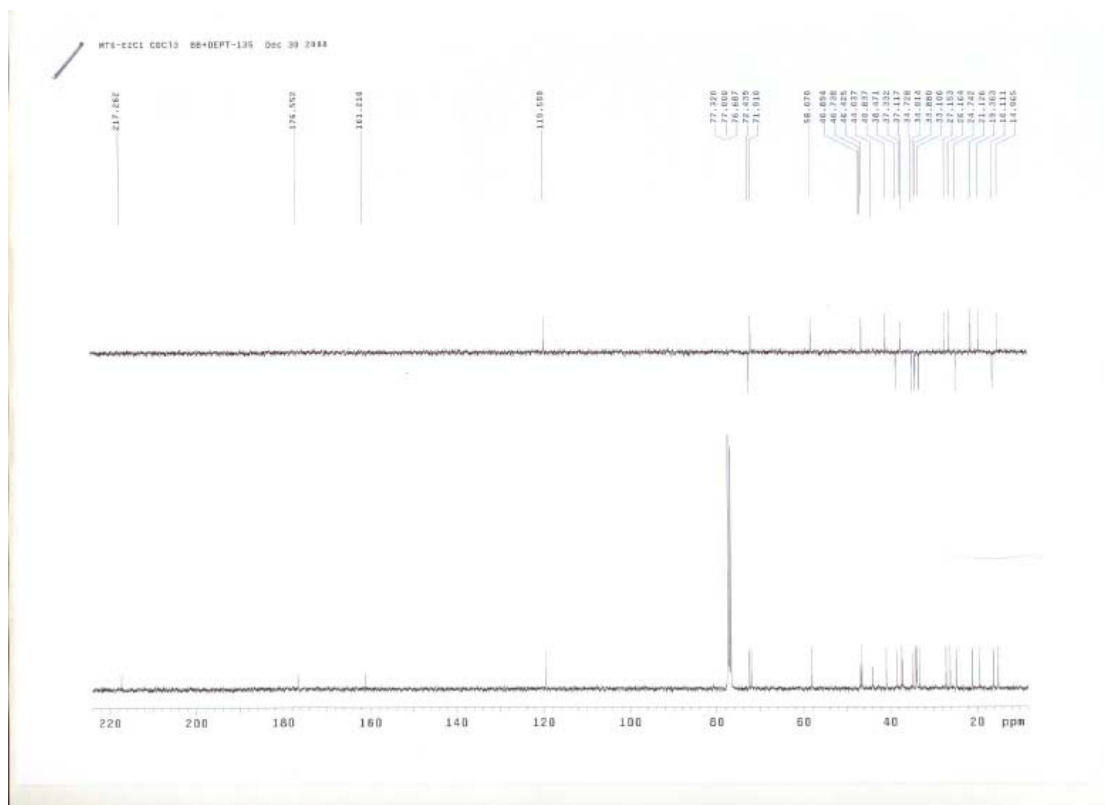

**S7. The  $^{13}\text{C}$  NMR Spectrum of Compound 3 in  $\text{CDCl}_3$**

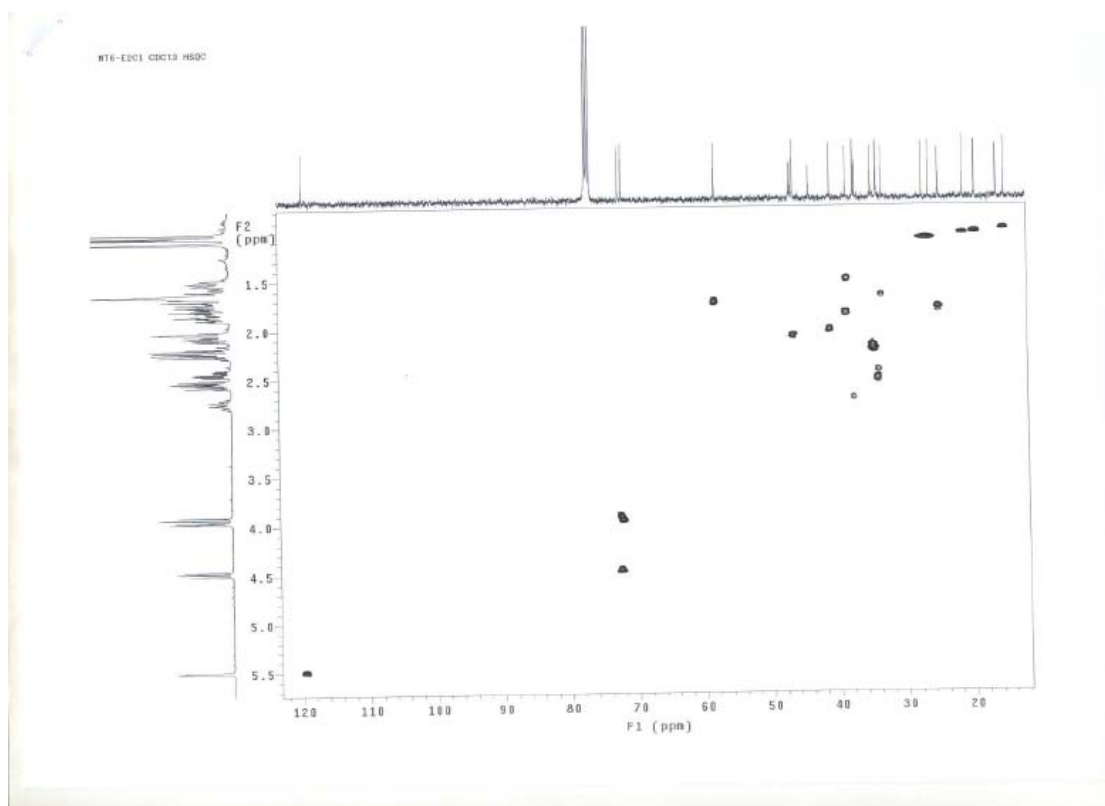

**S8. The HSQC NMR Spectrum of Compound 3 in  $\text{CDCl}_3$**

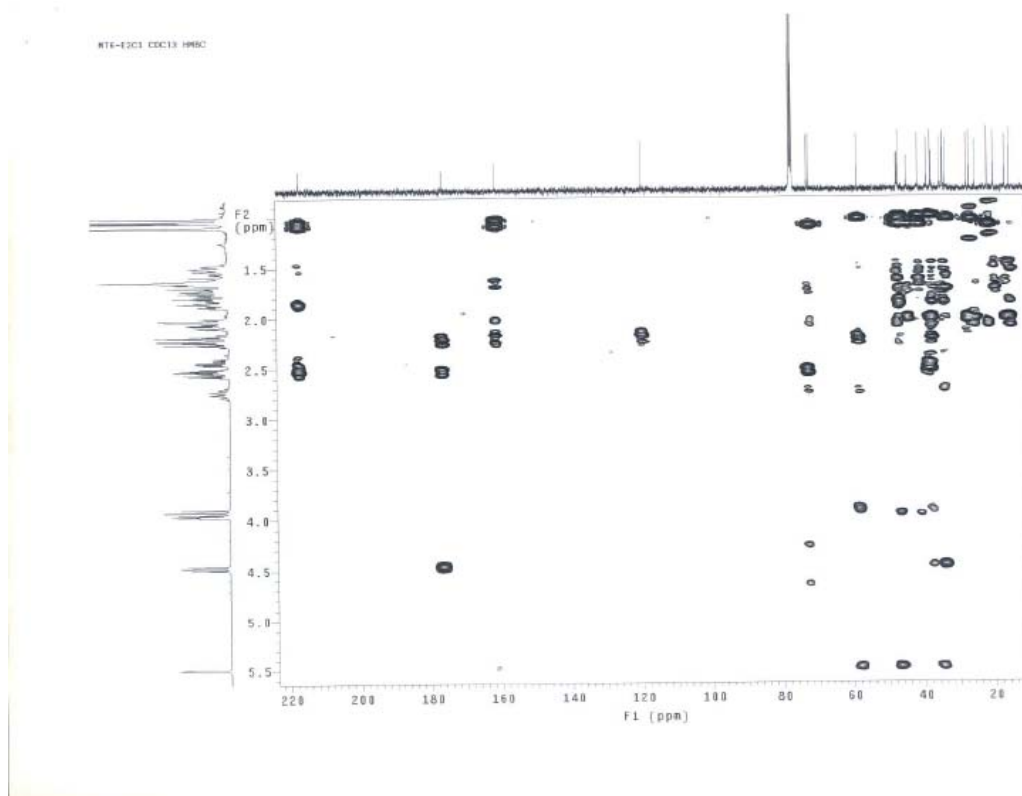

**S9. The HMQC NMR Spectrum of Compound 3 in  $\text{CDCl}_3$**

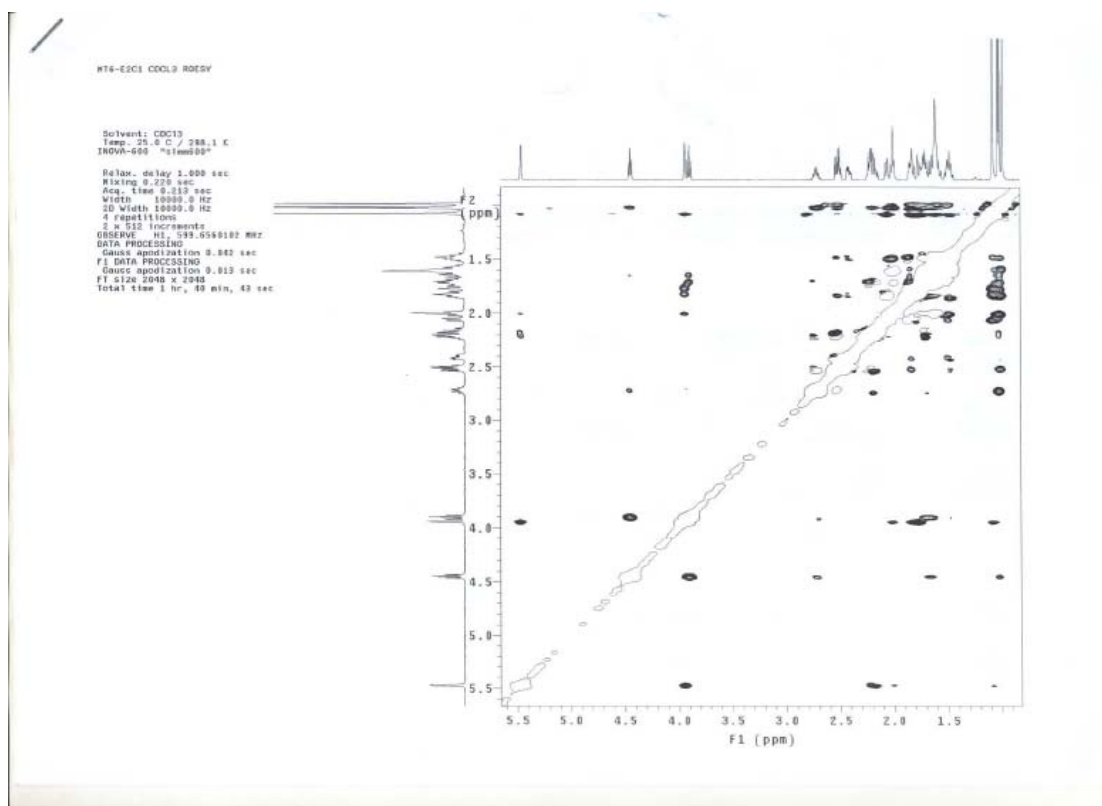

**S10. The ROESY NMR Spectrum of Compound 3 in  $\text{CDCl}_3$**



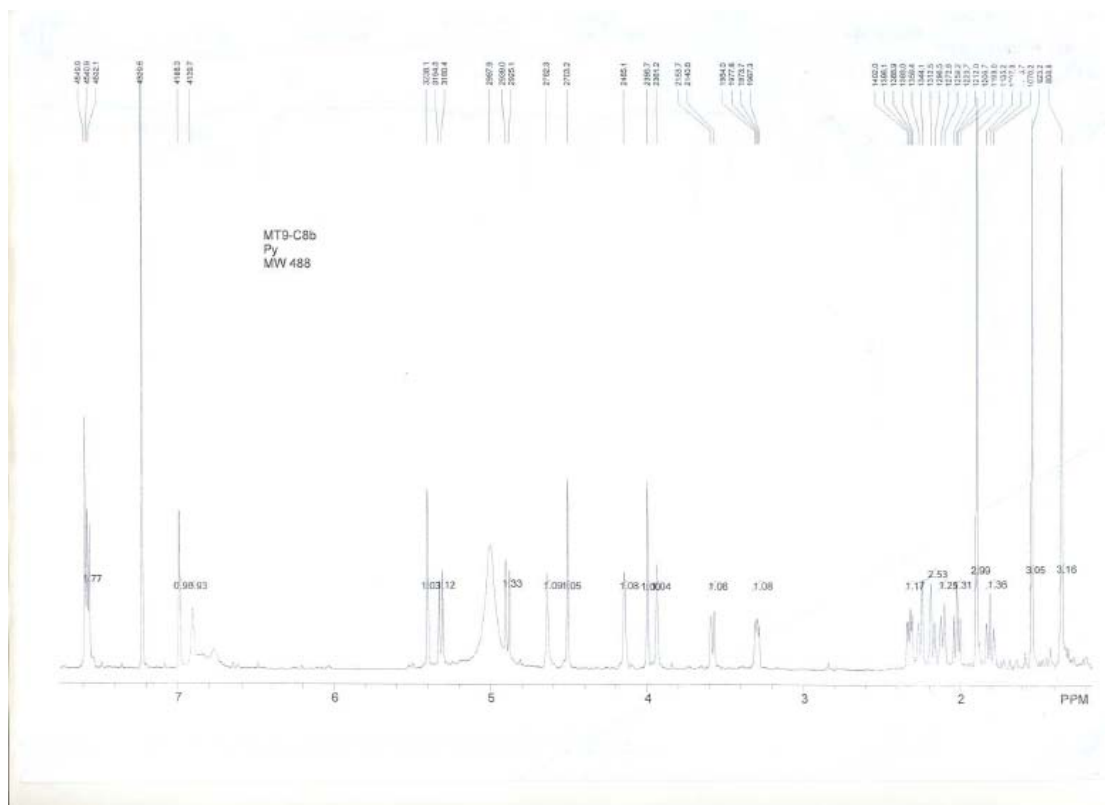

S11. The  $^1\text{H}$  NMR Spectrum of Compound 4 in  $\text{C}_5\text{D}_5\text{N}$

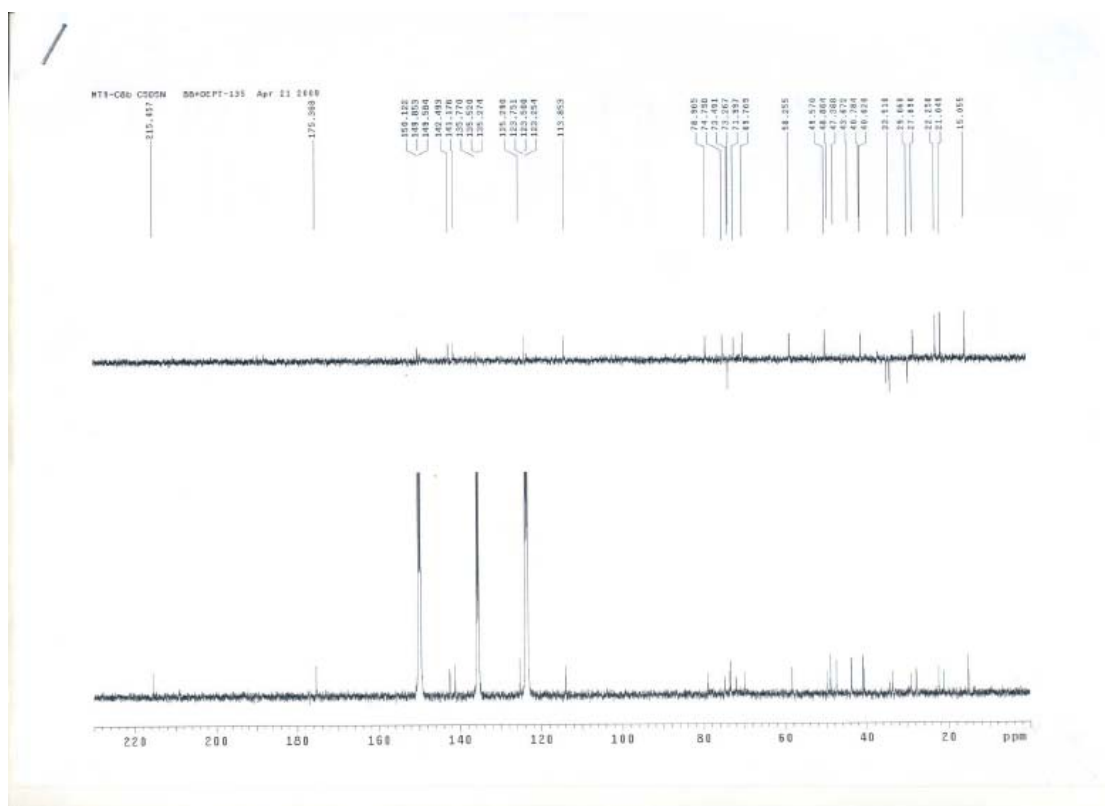

S12. The  $^{13}\text{C}$  NMR Spectrum of Compound 4 in  $\text{C}_5\text{D}_5\text{N}$

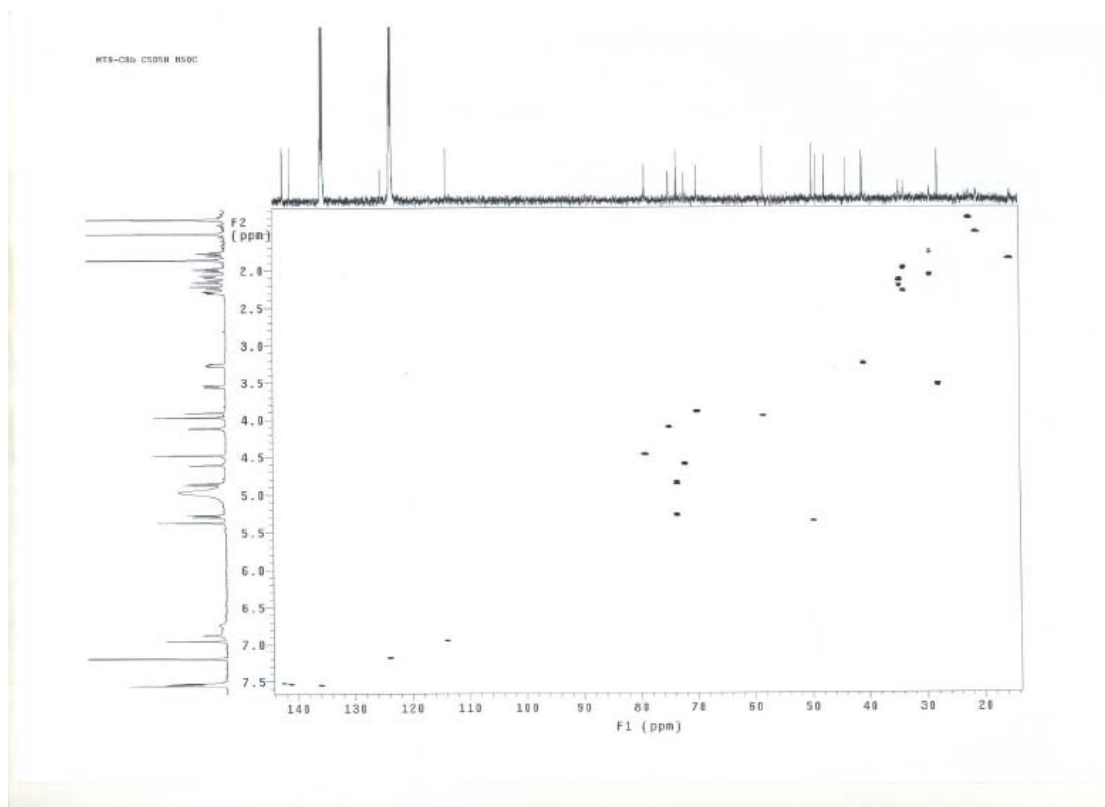

**S13. The HSQC NMR Spectrum of Compound 4 in C<sub>5</sub>D<sub>5</sub>N**

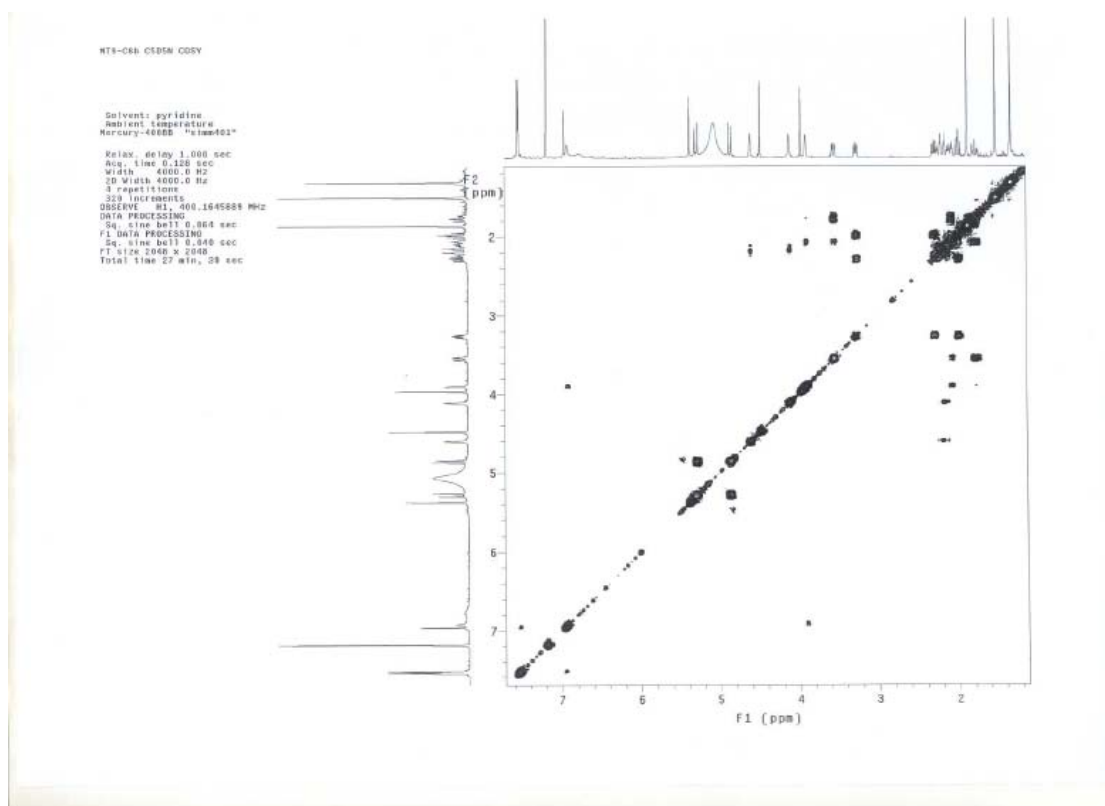

**S14. The <sup>1</sup>H-<sup>1</sup>H COSY NMR Spectrum of Compound 4 in C<sub>5</sub>D<sub>5</sub>N**

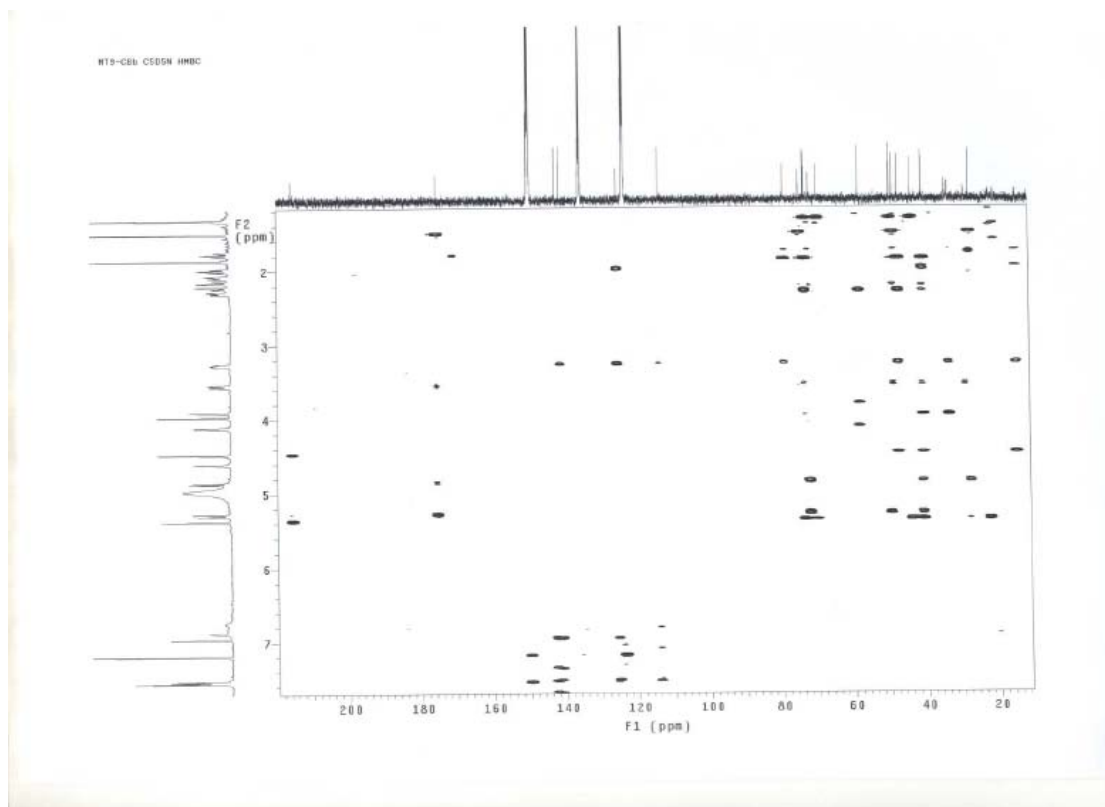

**S15. The HMBC NMR Spectrum of Compound 4 in  $C_5D_5N$**

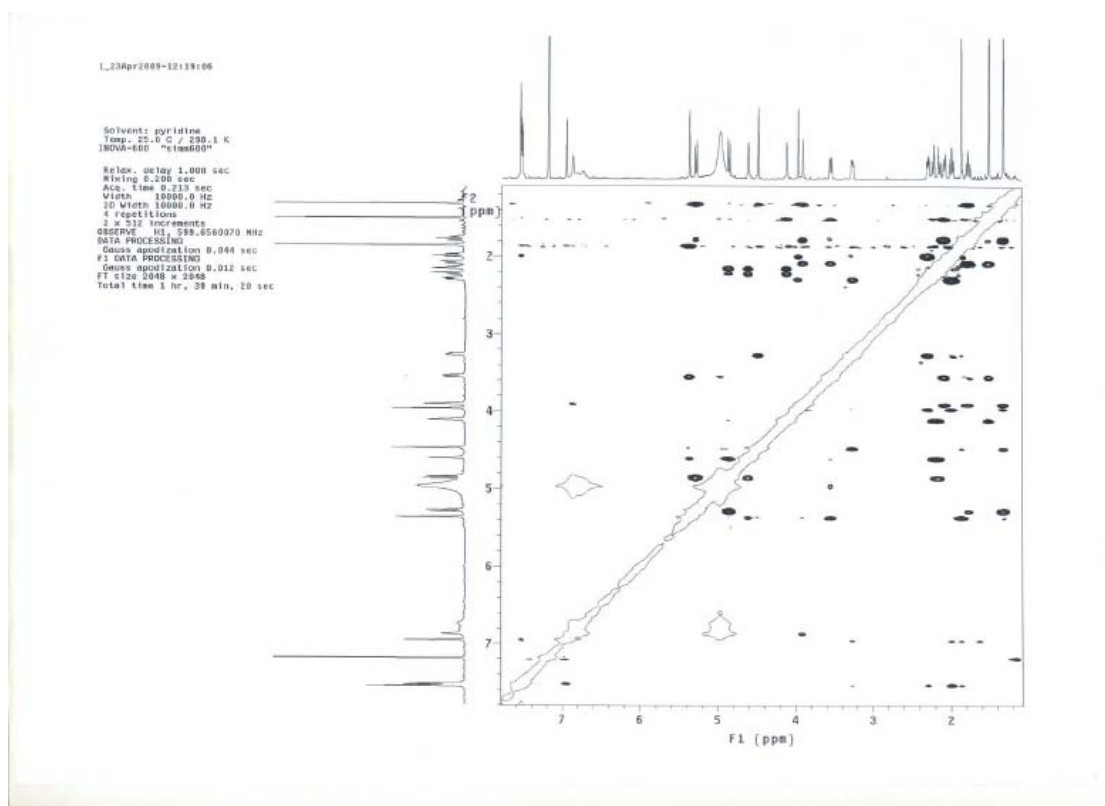

**S16. The ROESY NMR Spectrum of Compound 4 in  $C_5D_5N$**

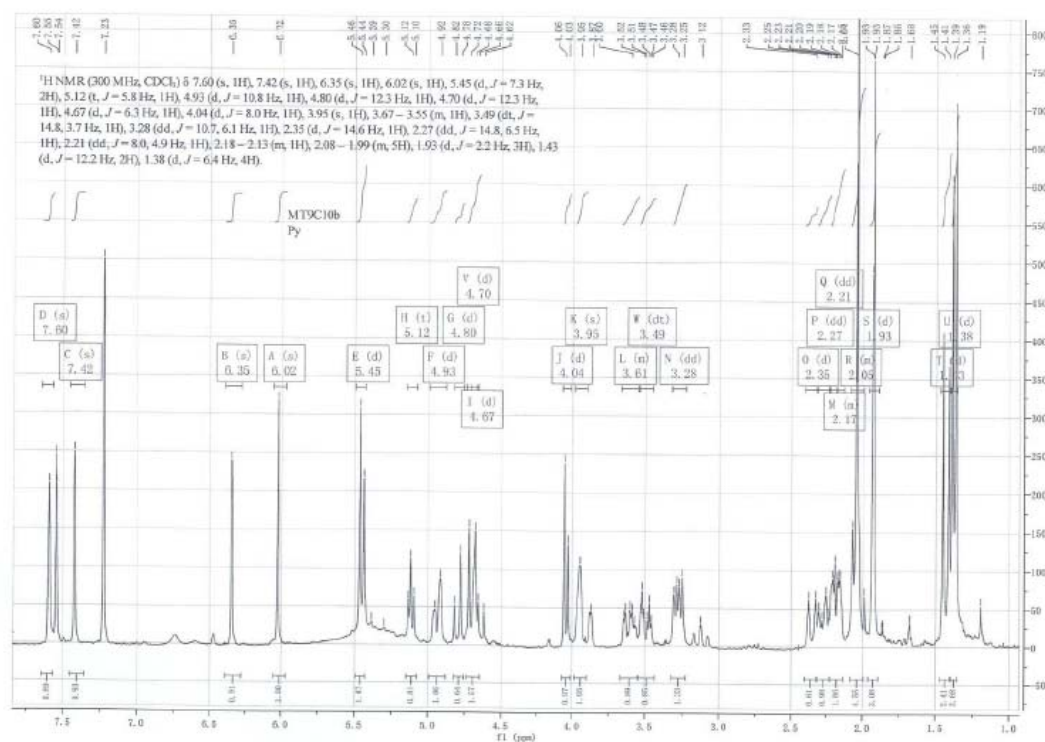

S17. The <sup>1</sup>H NMR Spectrum of Compound 6 in C<sub>5</sub>D<sub>5</sub>N

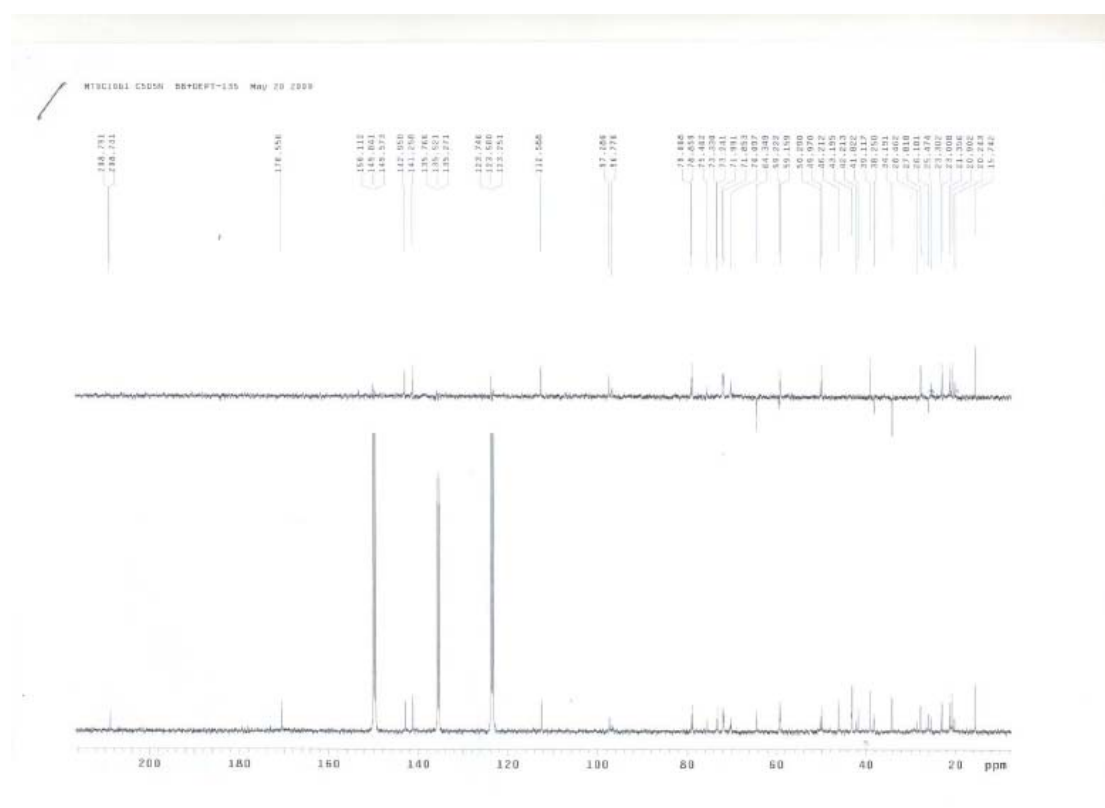

S18. The <sup>13</sup>C NMR Spectrum of Compound 6 in C<sub>5</sub>D<sub>5</sub>N

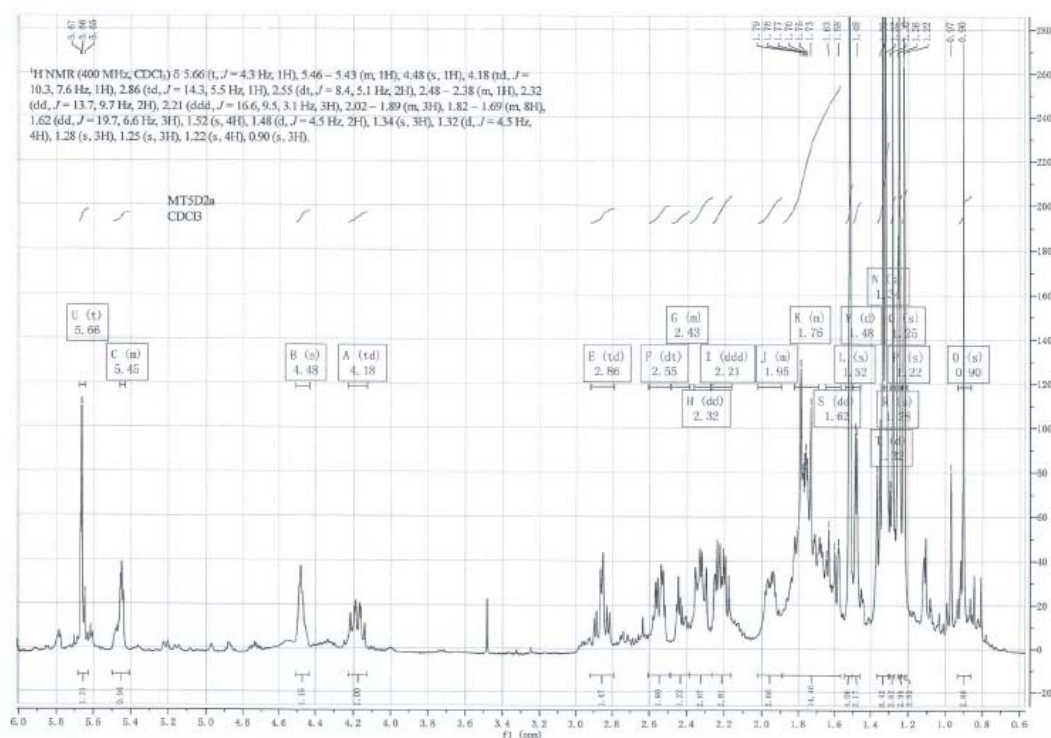

**S19. The <sup>1</sup>H NMR Spectrum of Compound 8 in CDCl<sub>3</sub>**

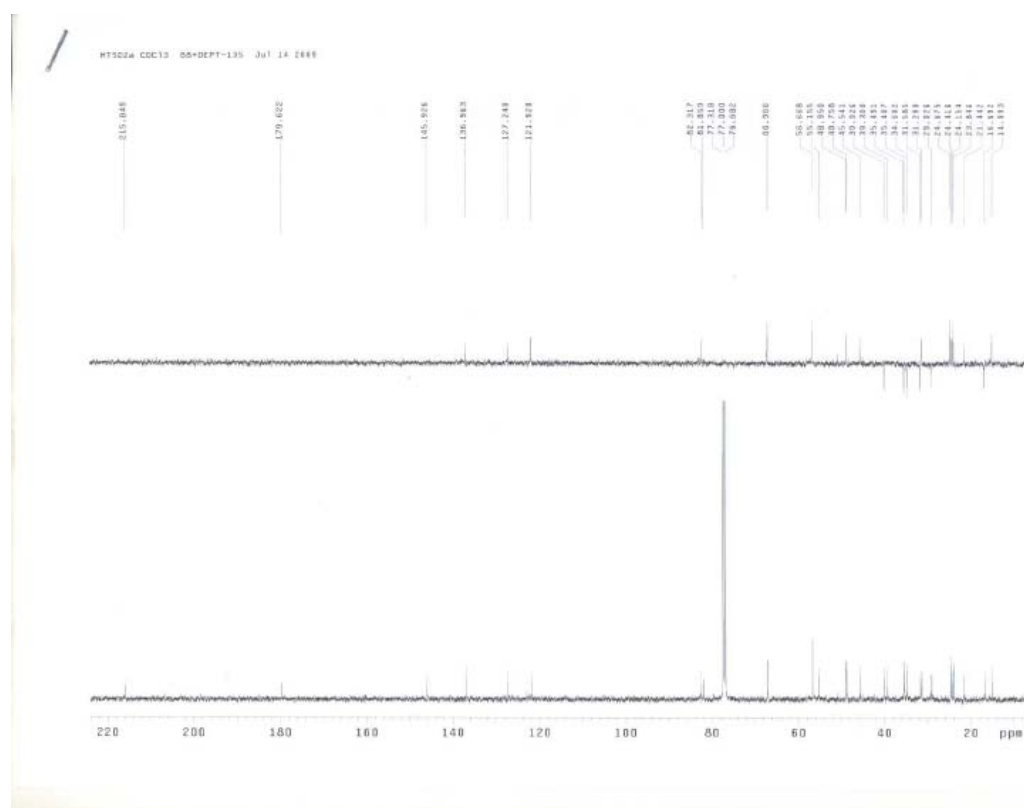

**S20. The <sup>13</sup>C NMR Spectrum of Compound 8 in CDCl<sub>3</sub>**

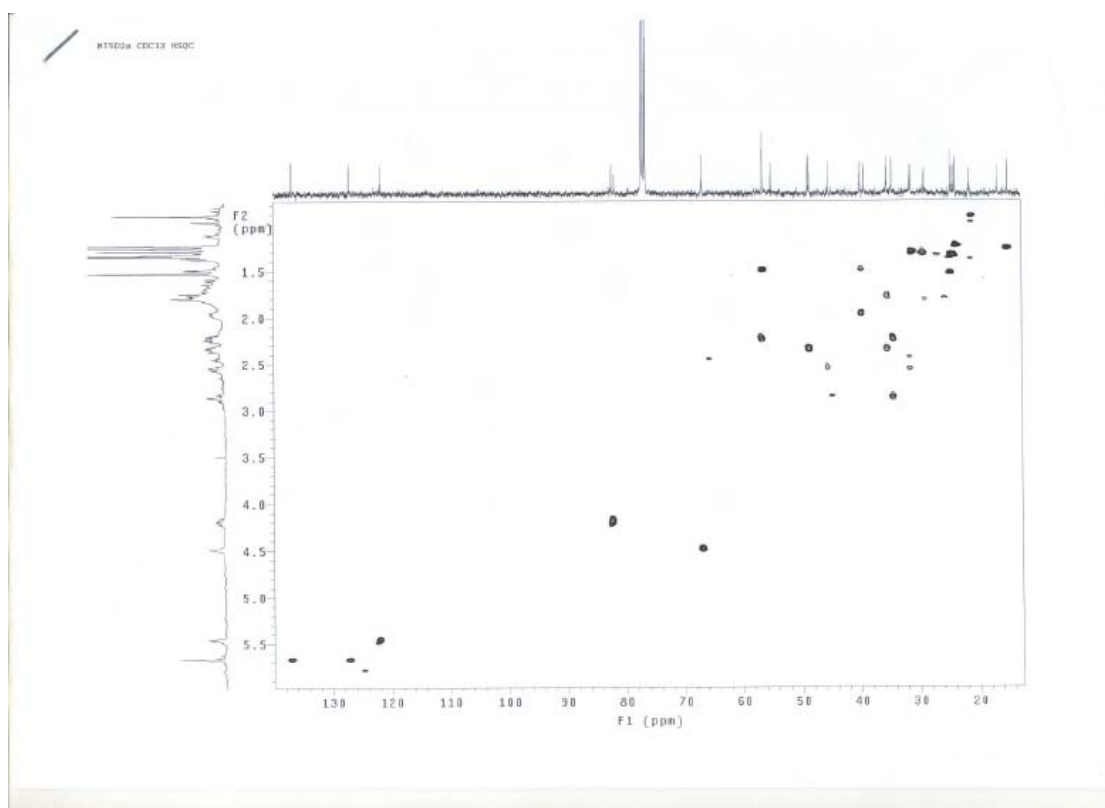

**S21. The HSQC NMR Spectrum of Compound 8 in CDCl<sub>3</sub>**

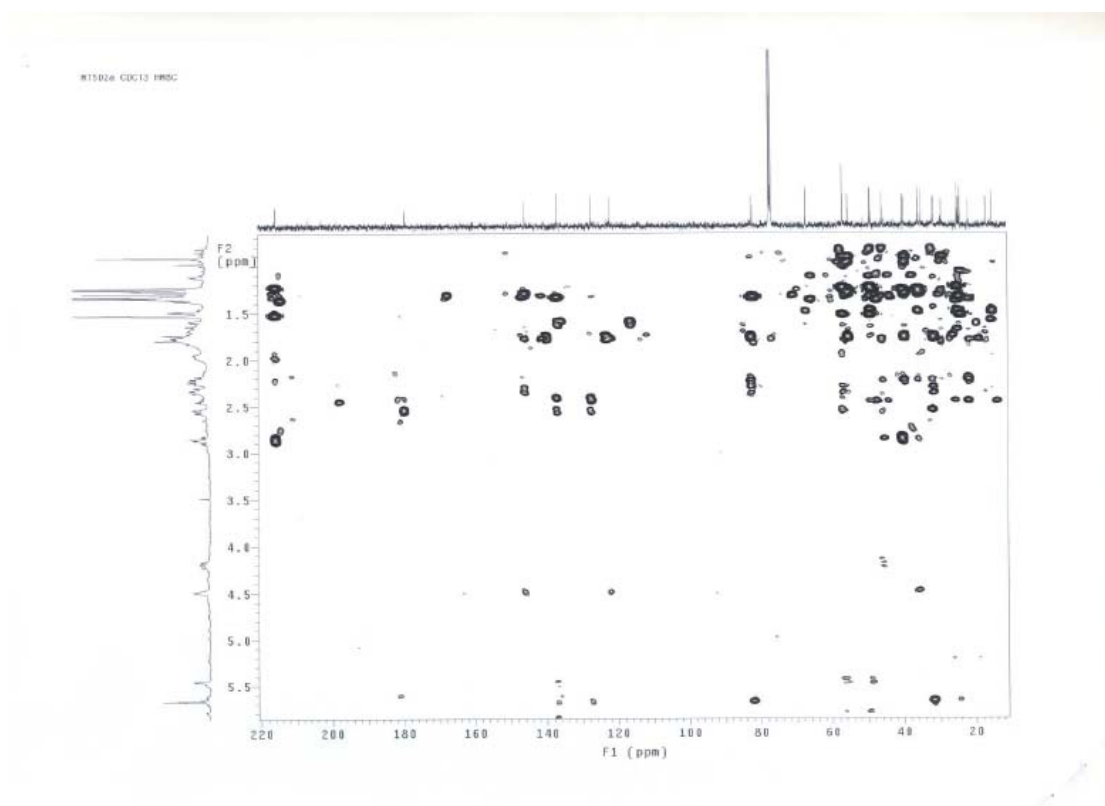

**S22. The HMBC NMR Spectrum of Compound 8 in CDCl<sub>3</sub>**

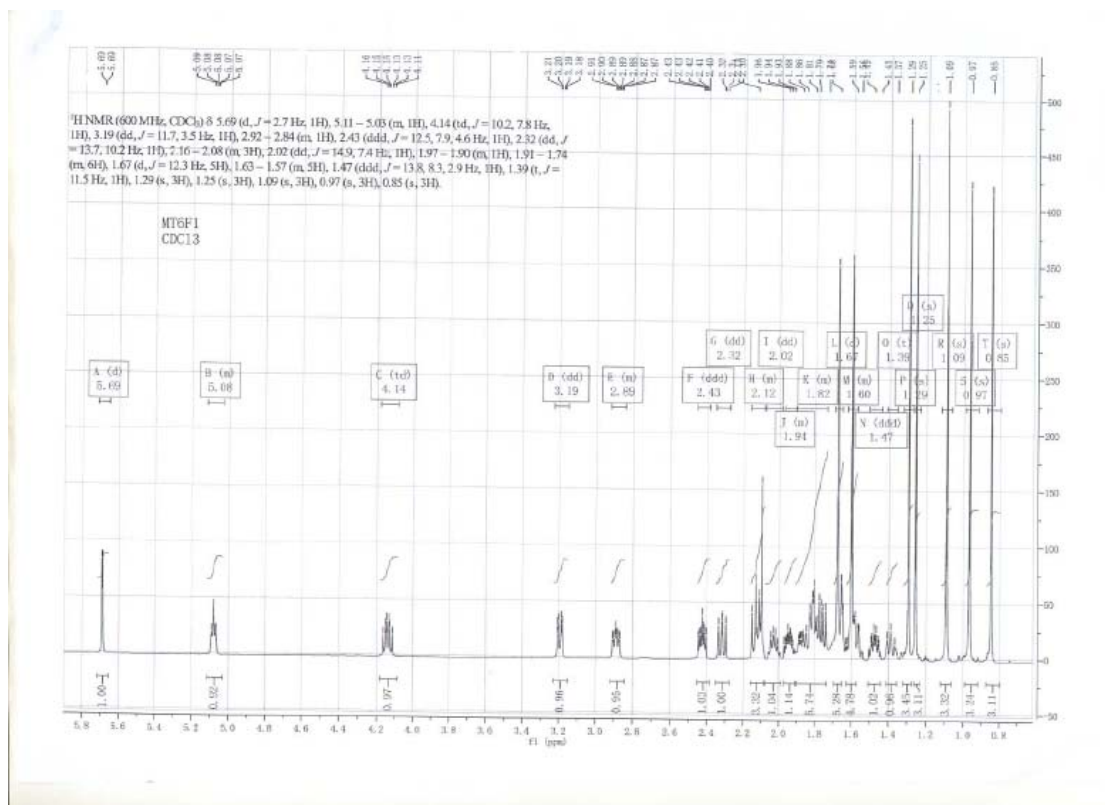

S23. The <sup>1</sup>H NMR Spectrum of Compound 9 in CDCl<sub>3</sub>

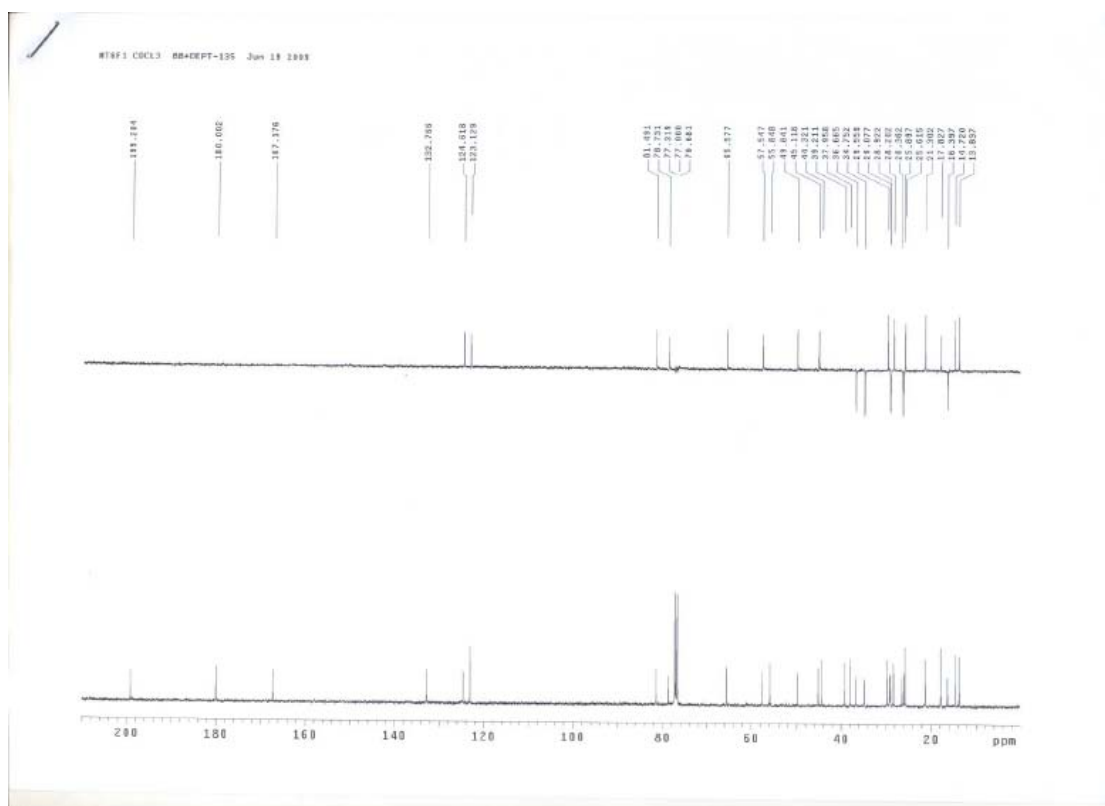

S24. The <sup>13</sup>C NMR Spectrum of Compound 9 in CDCl<sub>3</sub>

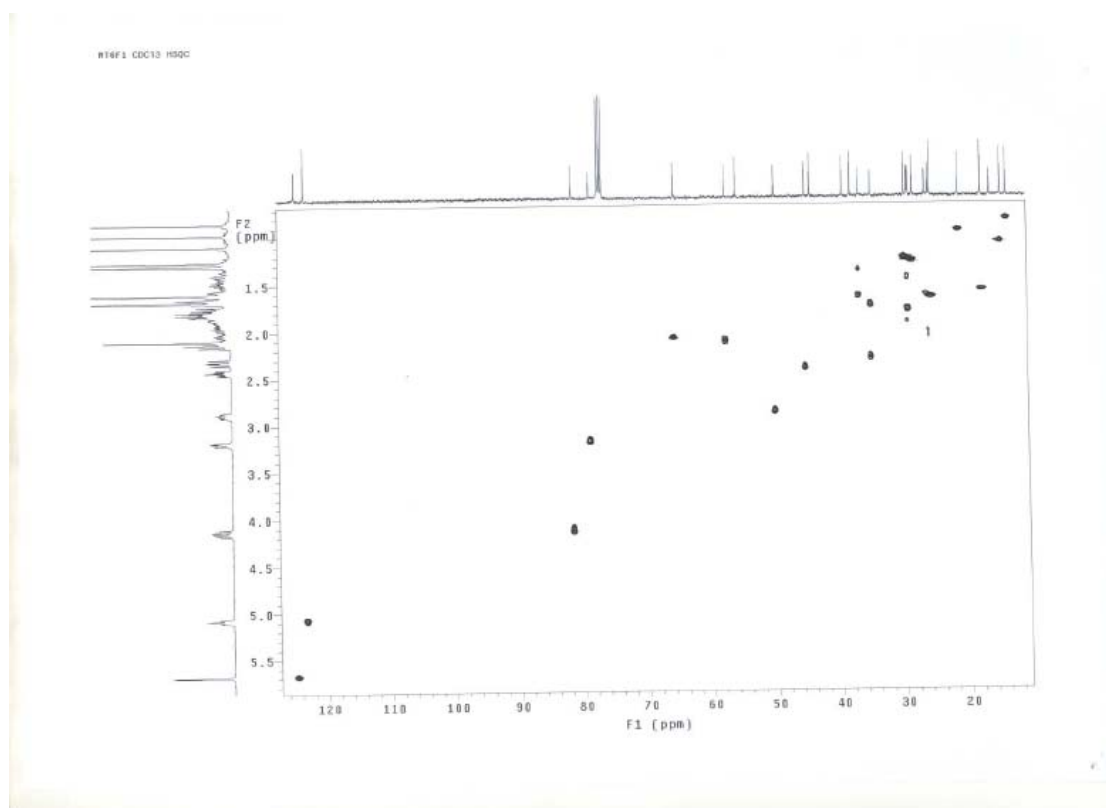

**S25. The HSQC NMR Spectrum of Compound 9 in CDCl<sub>3</sub>**

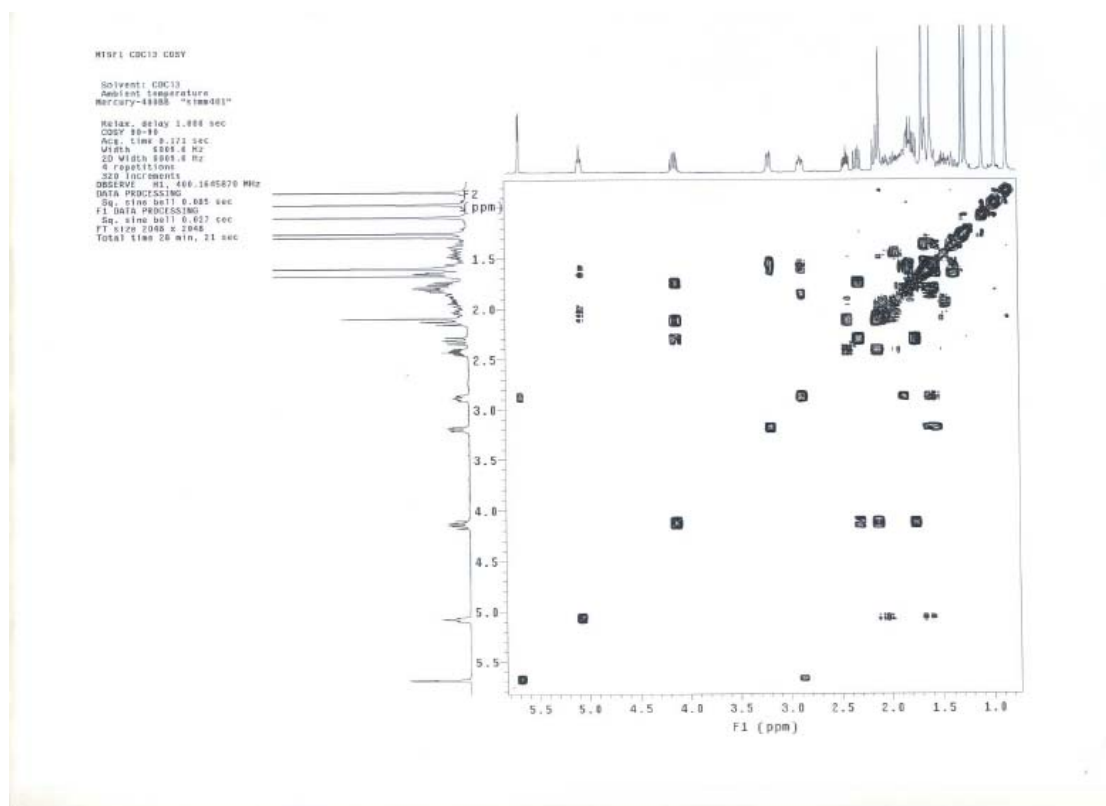

**S26. The <sup>1</sup>H-<sup>1</sup>H COSY NMR Spectrum of Compound 9 in CDCl<sub>3</sub>**



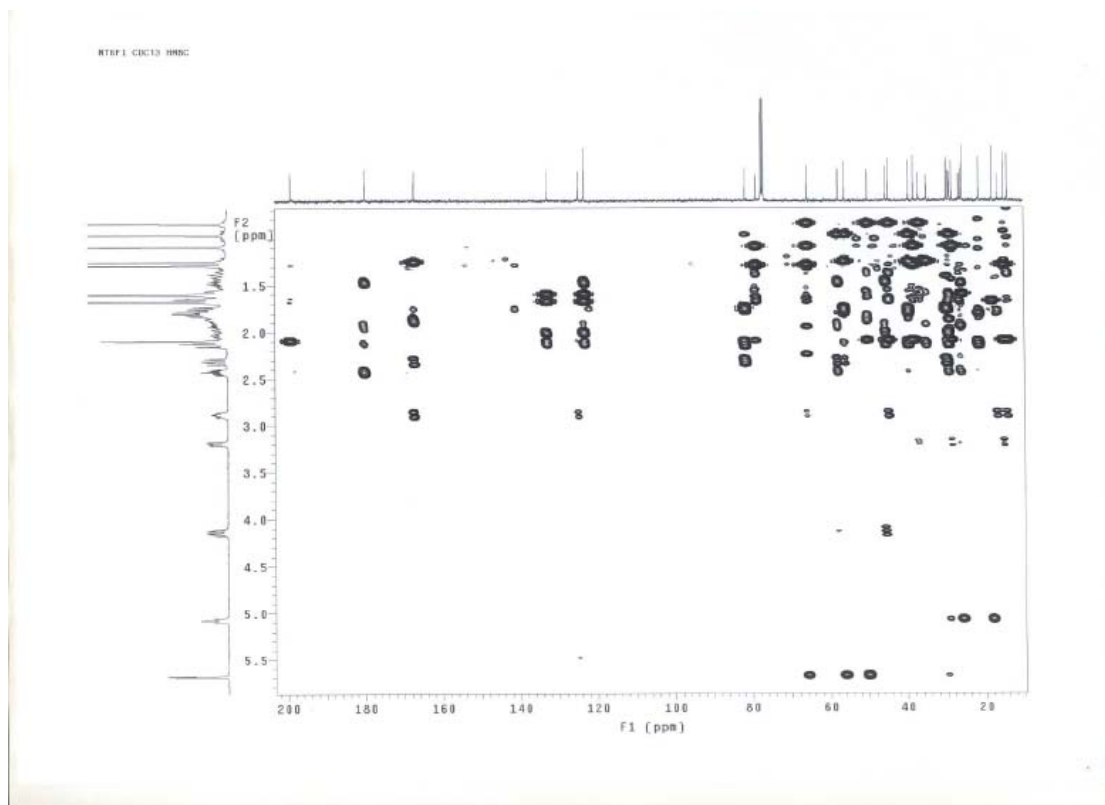

**S27. The HMQC NMR Spectrum of Compound 9 in CDCl<sub>3</sub>**

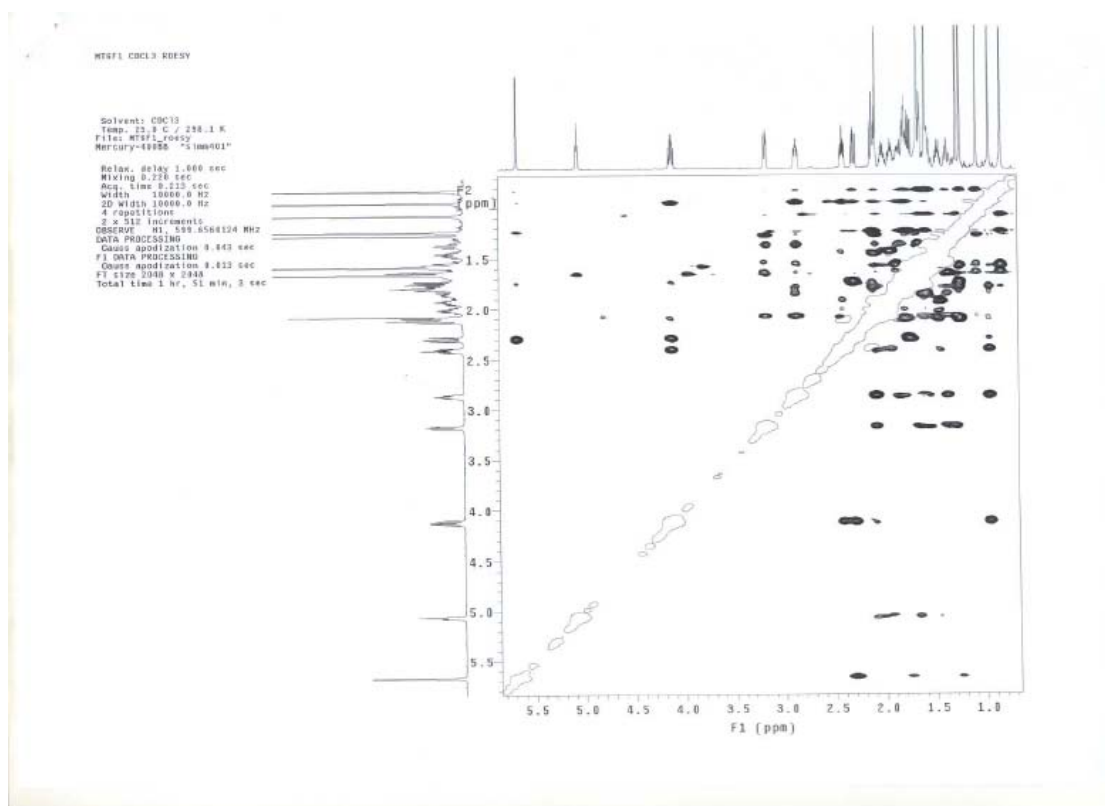

**S28. The ROESY NMR Spectrum of Compound 9 in CDCl<sub>3</sub>**

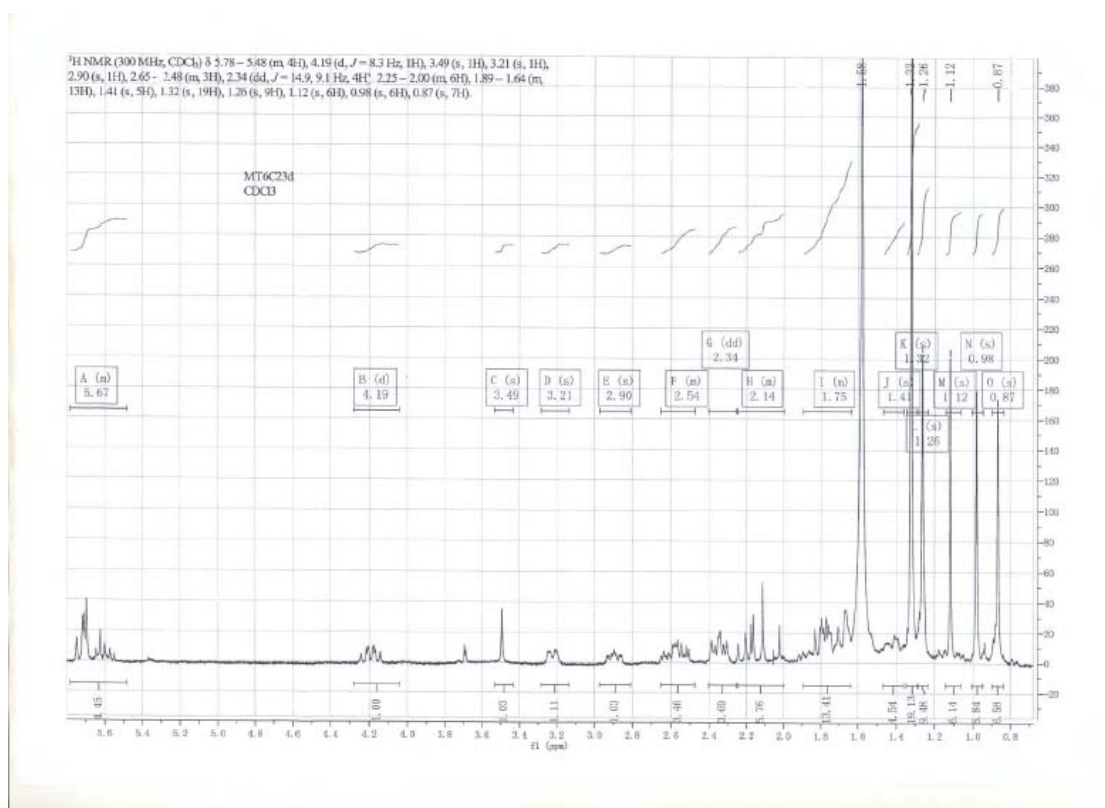

S29. The  $^1\text{H}$  NMR Spectrum of Compound 10 in  $\text{CDCl}_3$

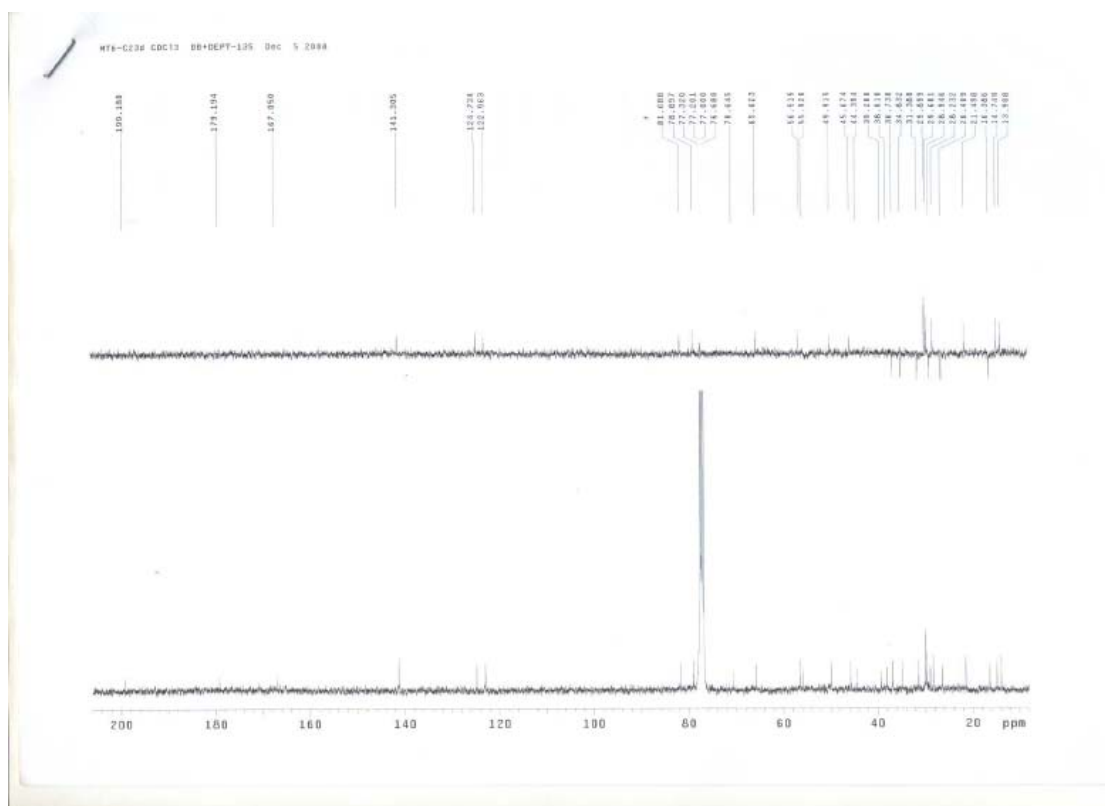

S30. The  $^{13}\text{C}$  NMR Spectrum of Compound 10 in  $\text{CDCl}_3$

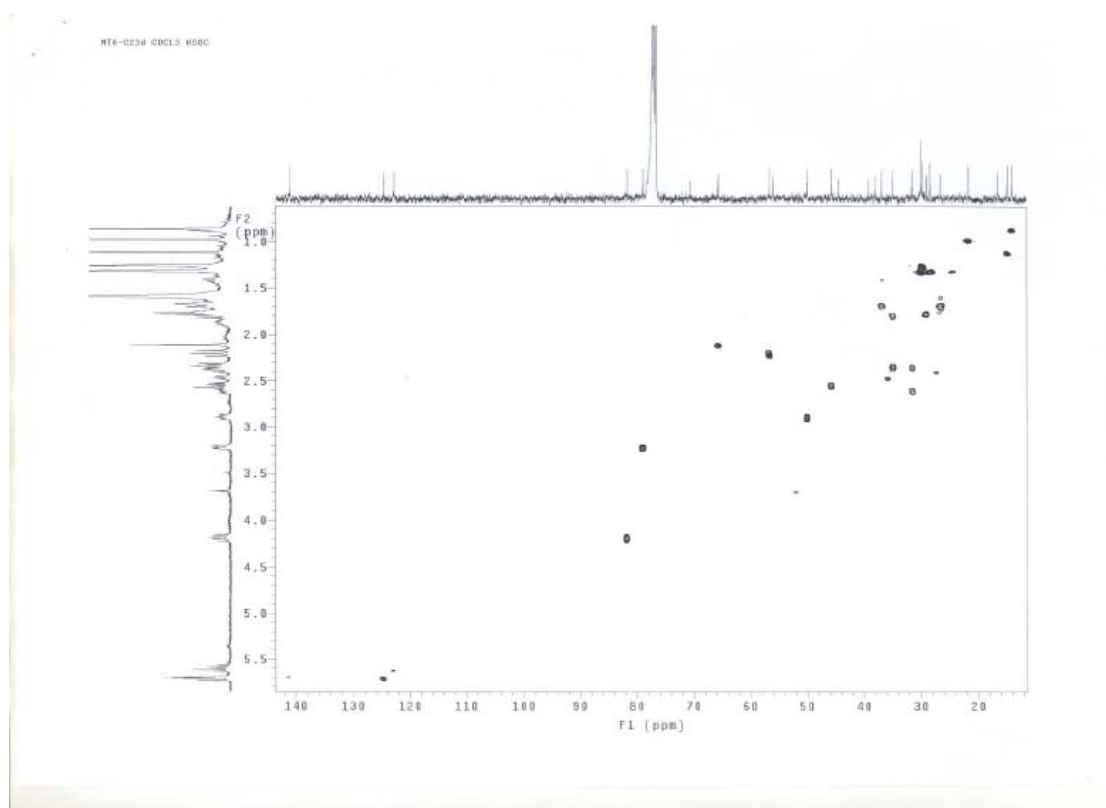

**S31. The HSQC NMR Spectrum of Compound 10 in CDCl<sub>3</sub>**

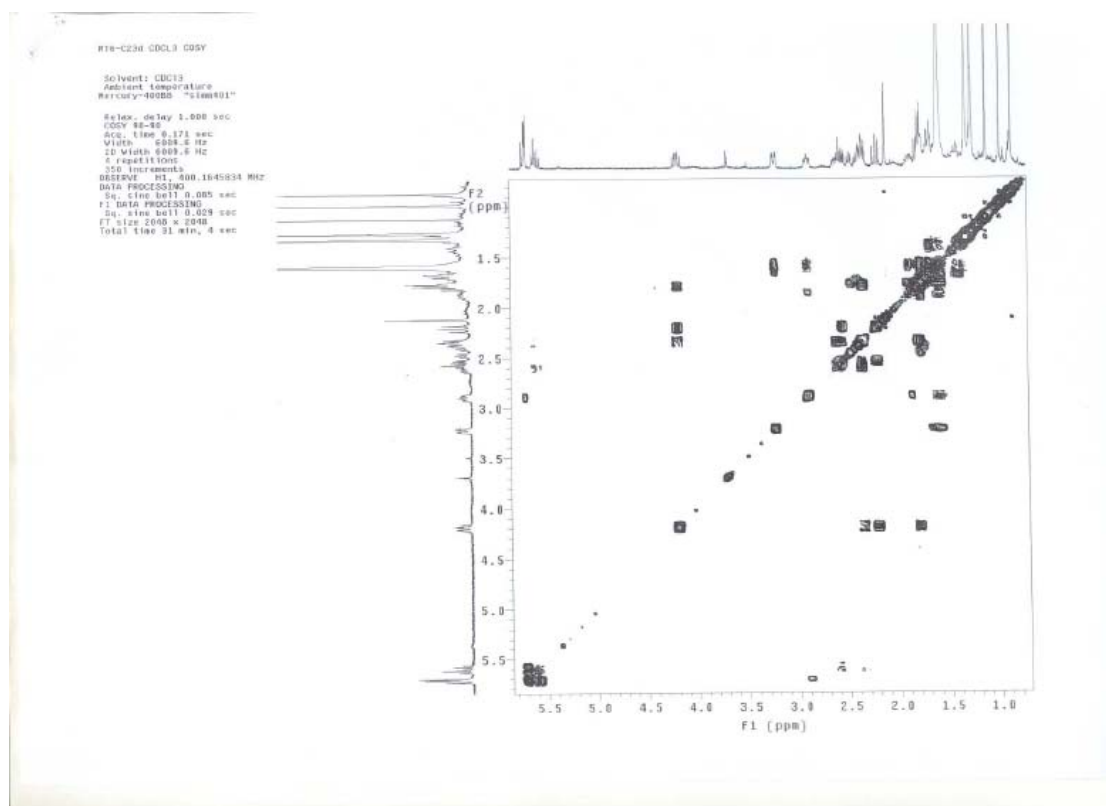

**S32. The <sup>1</sup>H-<sup>1</sup>H COSY NMR Spectrum of Compound 10 in CDCl<sub>3</sub>**

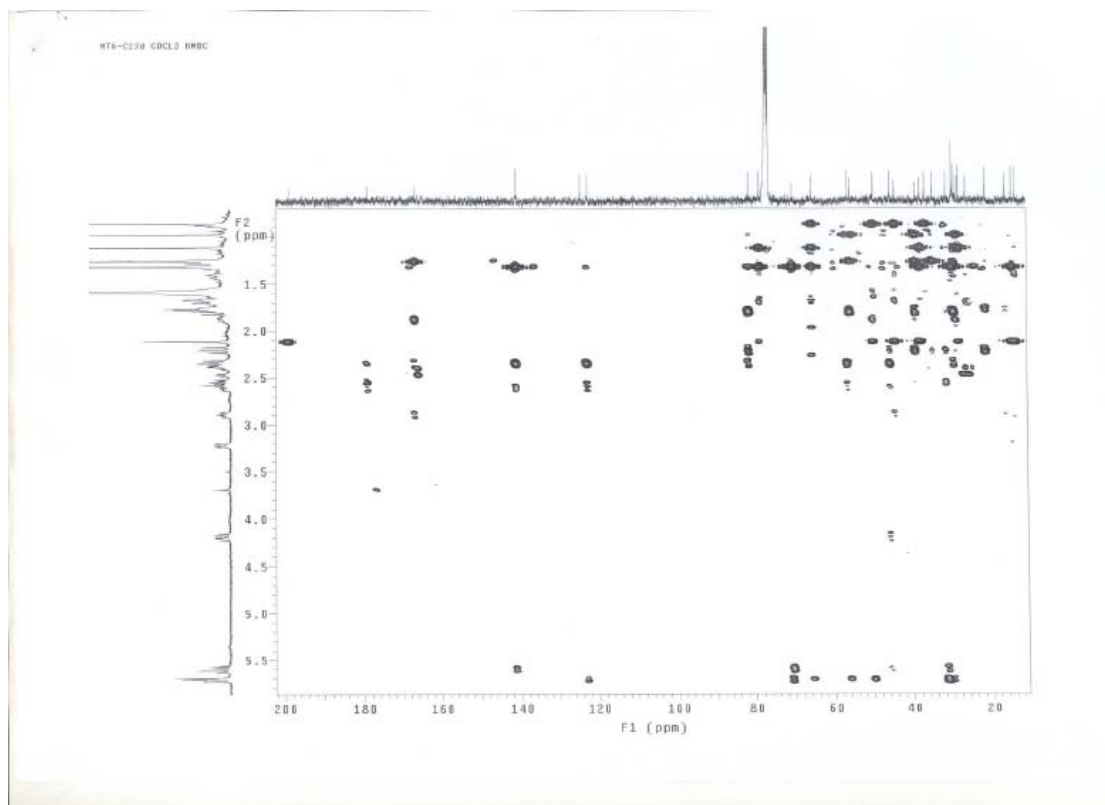

**S33. The HMBC NMR Spectrum of Compound 10 in CDCl<sub>3</sub>**

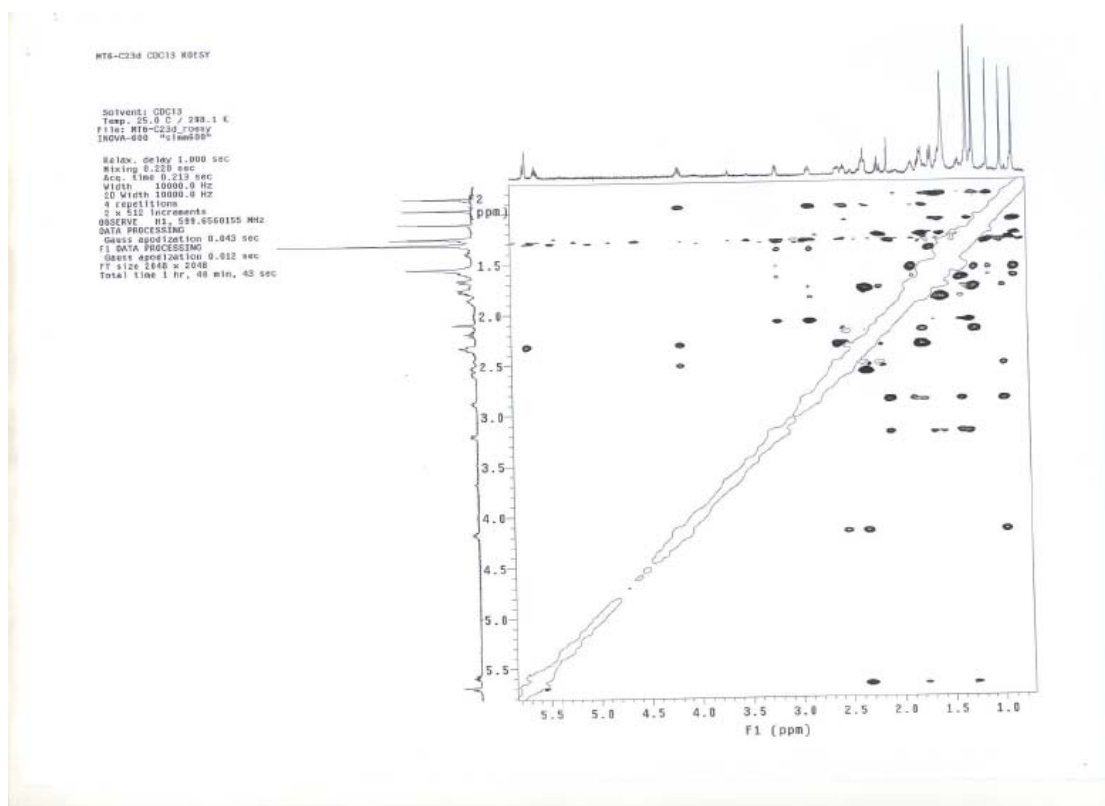

**S34. The ROESY NMR Spectrum of Compound 10 in CDCl<sub>3</sub>**

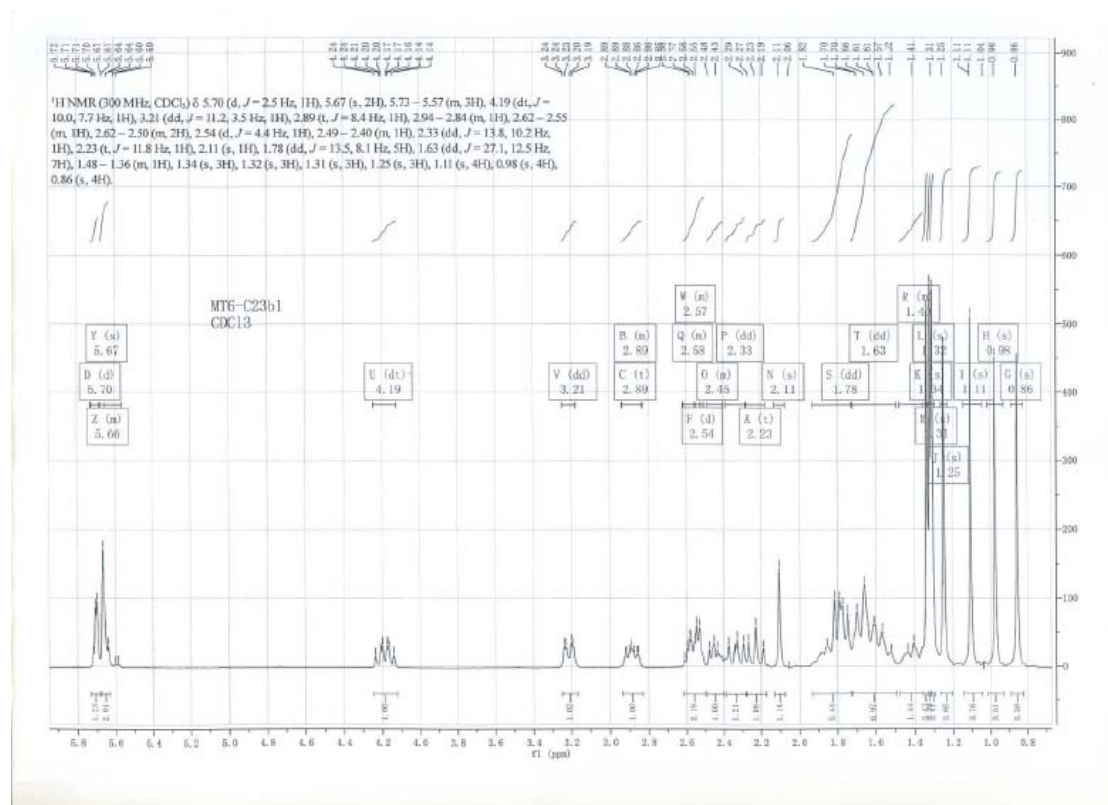

S35. The <sup>1</sup>H NMR Spectrum of Compound 11 in CDCl<sub>3</sub>

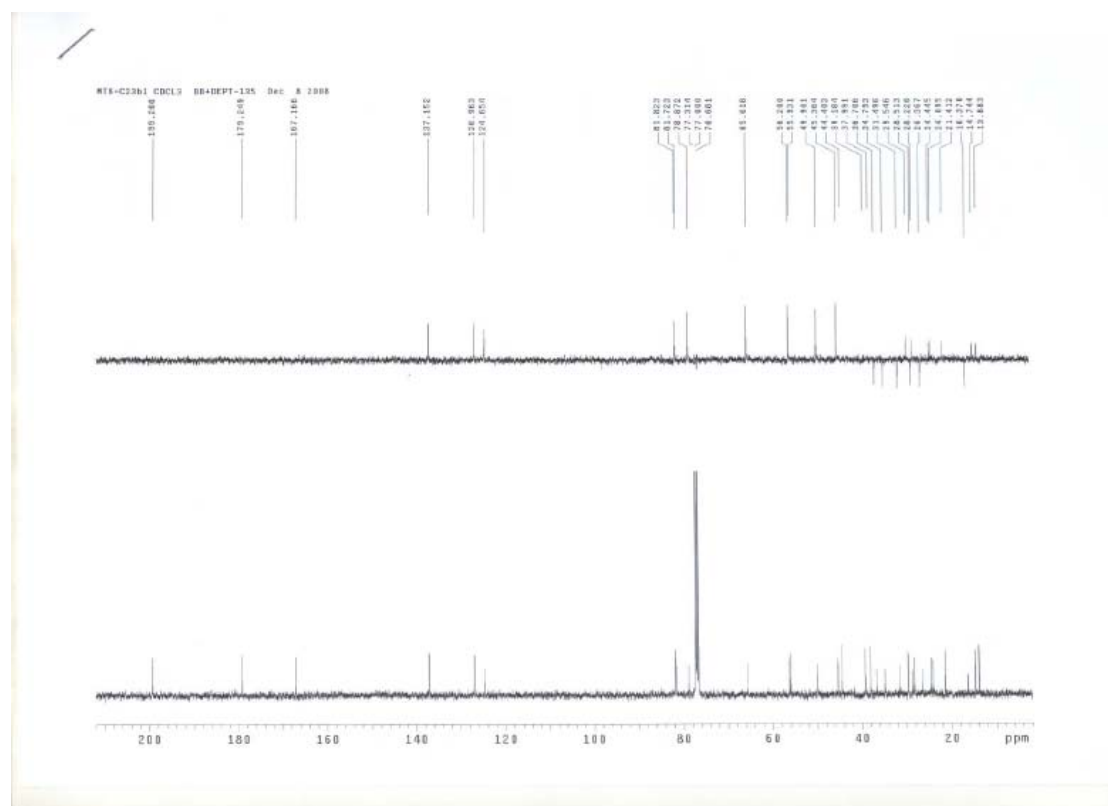

S36. The <sup>13</sup>C NMR Spectrum of Compound 11 in CDCl<sub>3</sub>

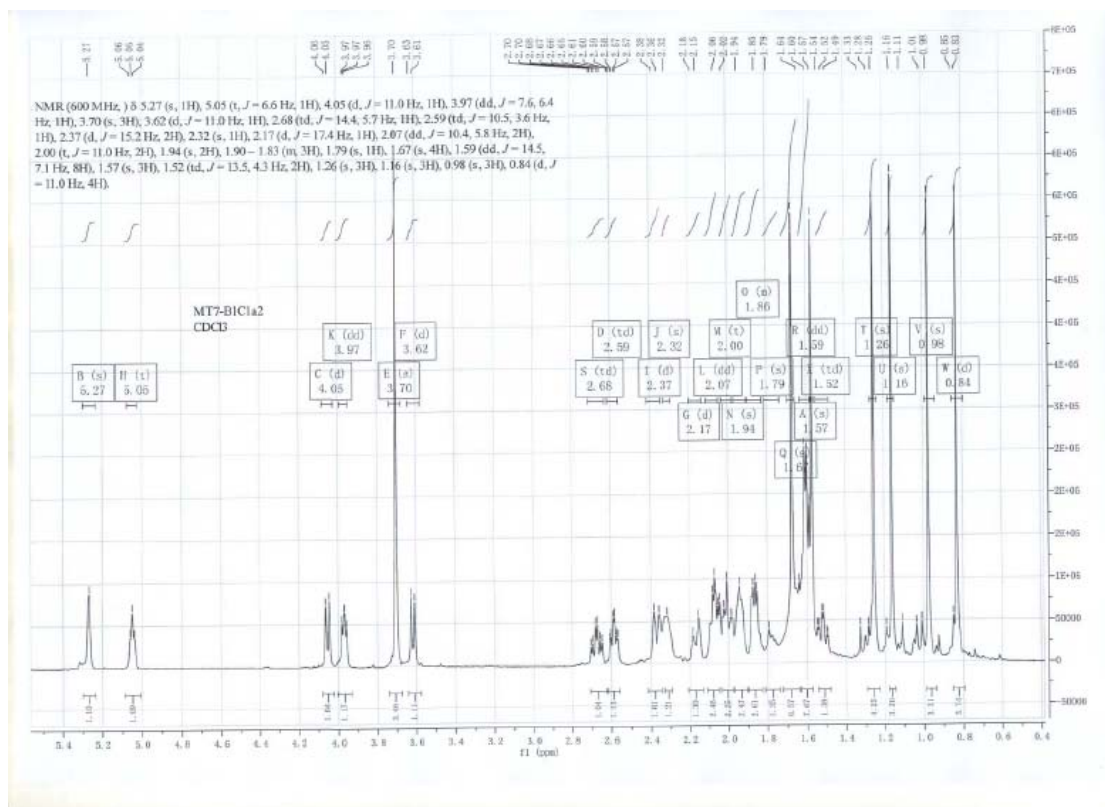

S37. The  $^1\text{H}$  NMR Spectrum of Compound 12 in  $\text{CDCl}_3$

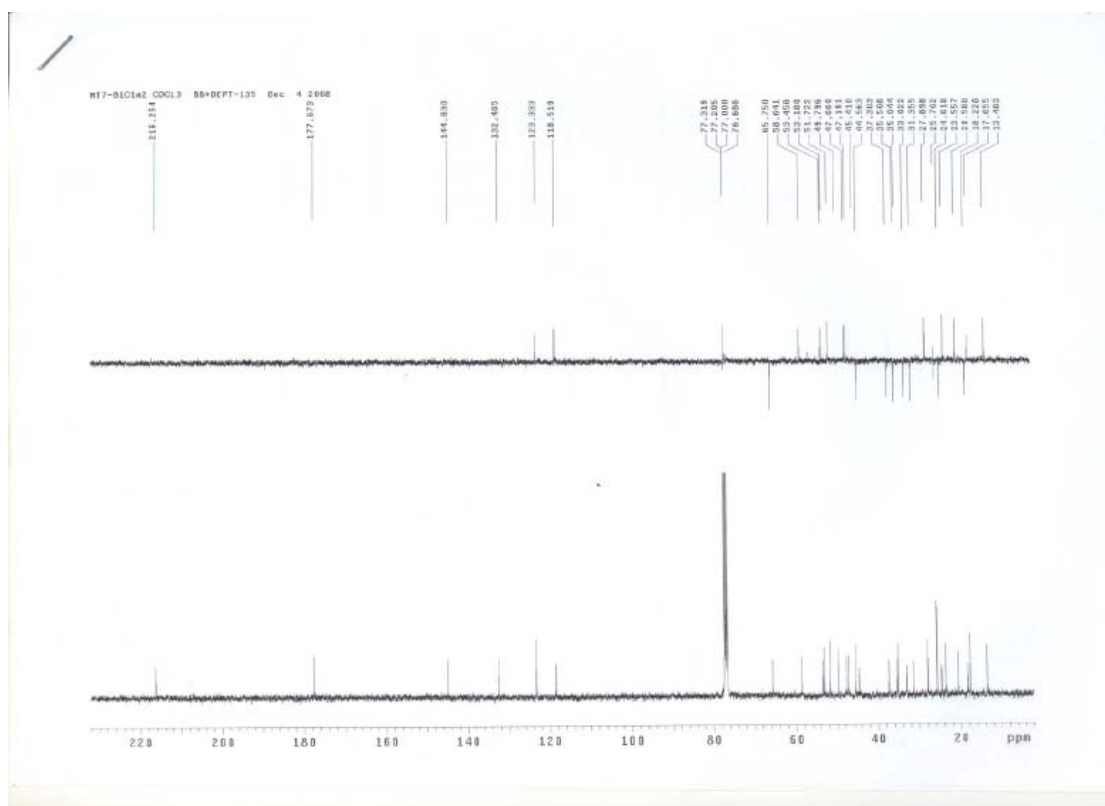

S38. The  $^{13}\text{C}$  NMR Spectrum of Compound 12 in  $\text{CDCl}_3$

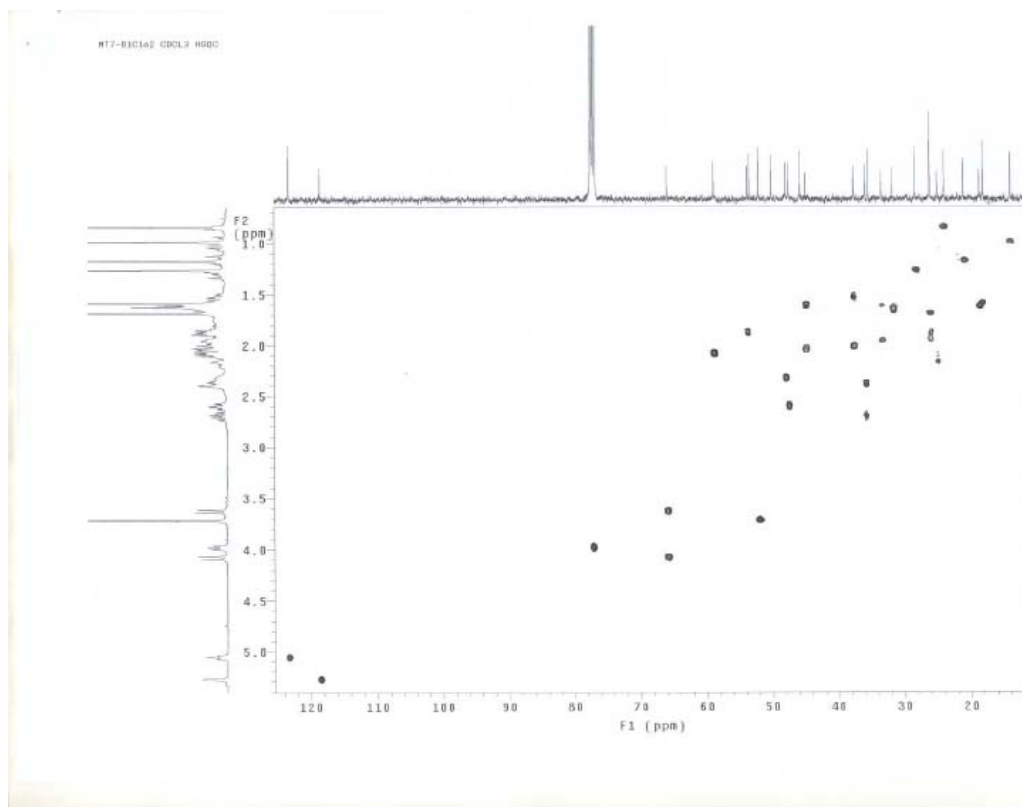

**S39. The HSQC NMR Spectrum of Compound 12 in  $\text{CDCl}_3$**

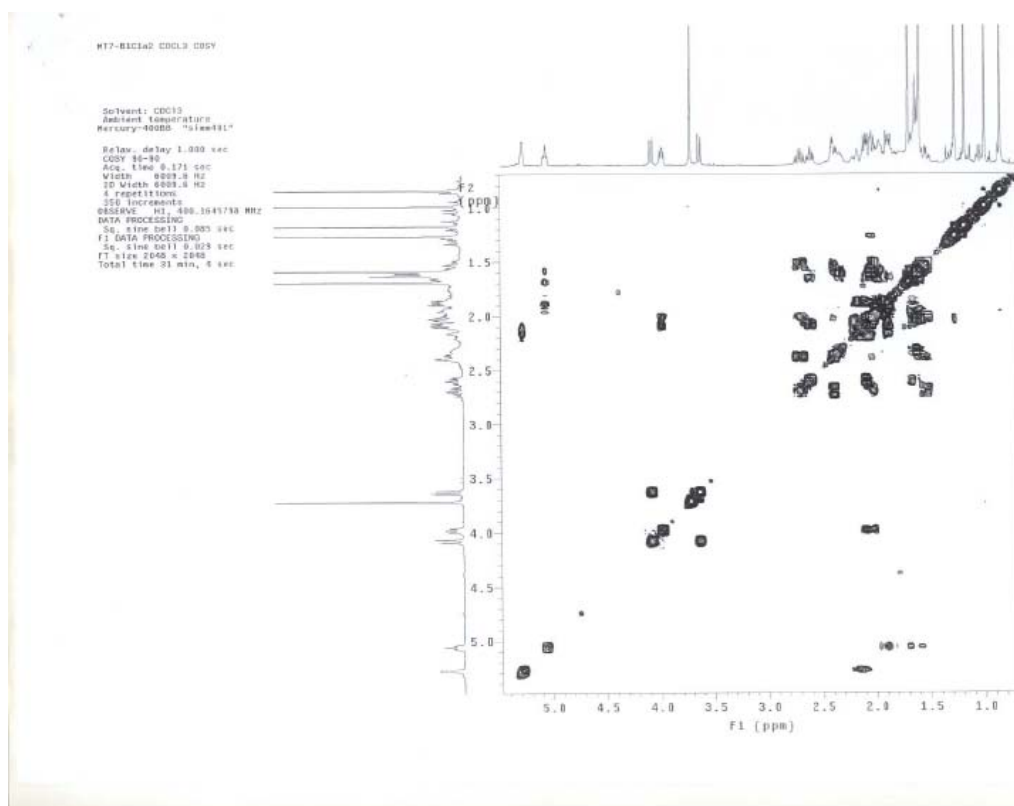

**S40. The  $^1\text{H}$ - $^1\text{H}$  COSY NMR Spectrum of Compound 12 in  $\text{CDCl}_3$**



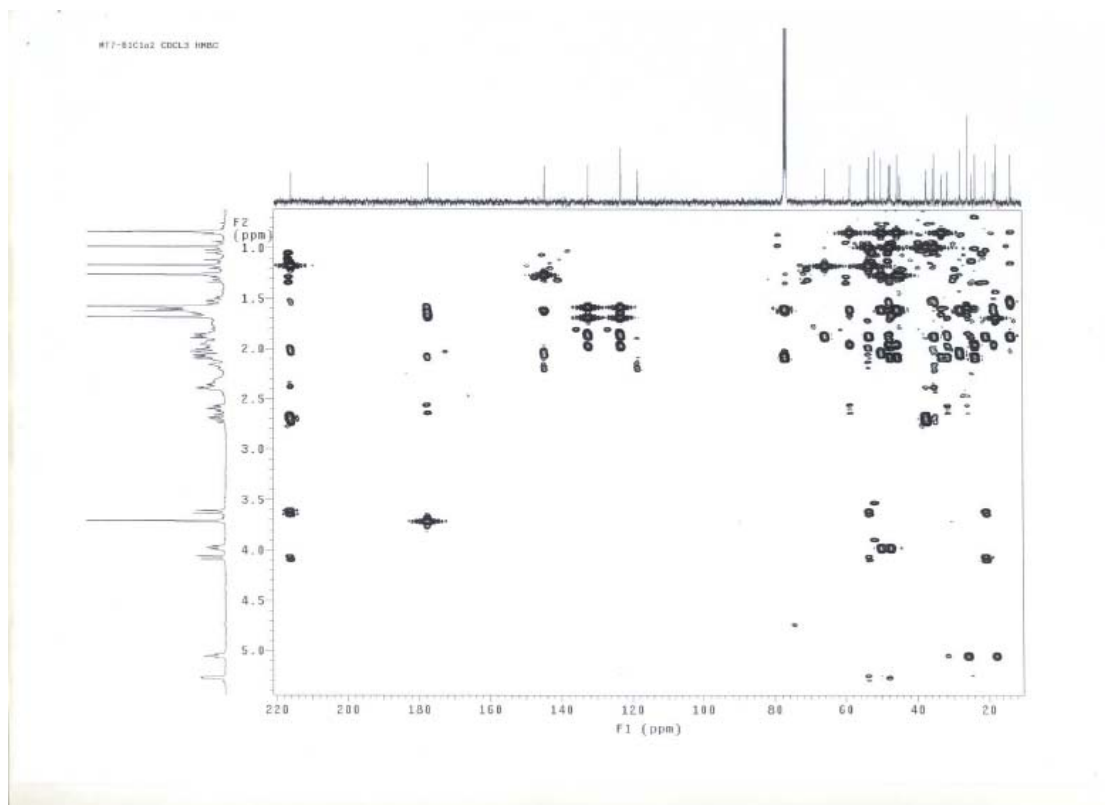

**S41. The HMBC NMR Spectrum of Compound 12 in CDCl<sub>3</sub>**

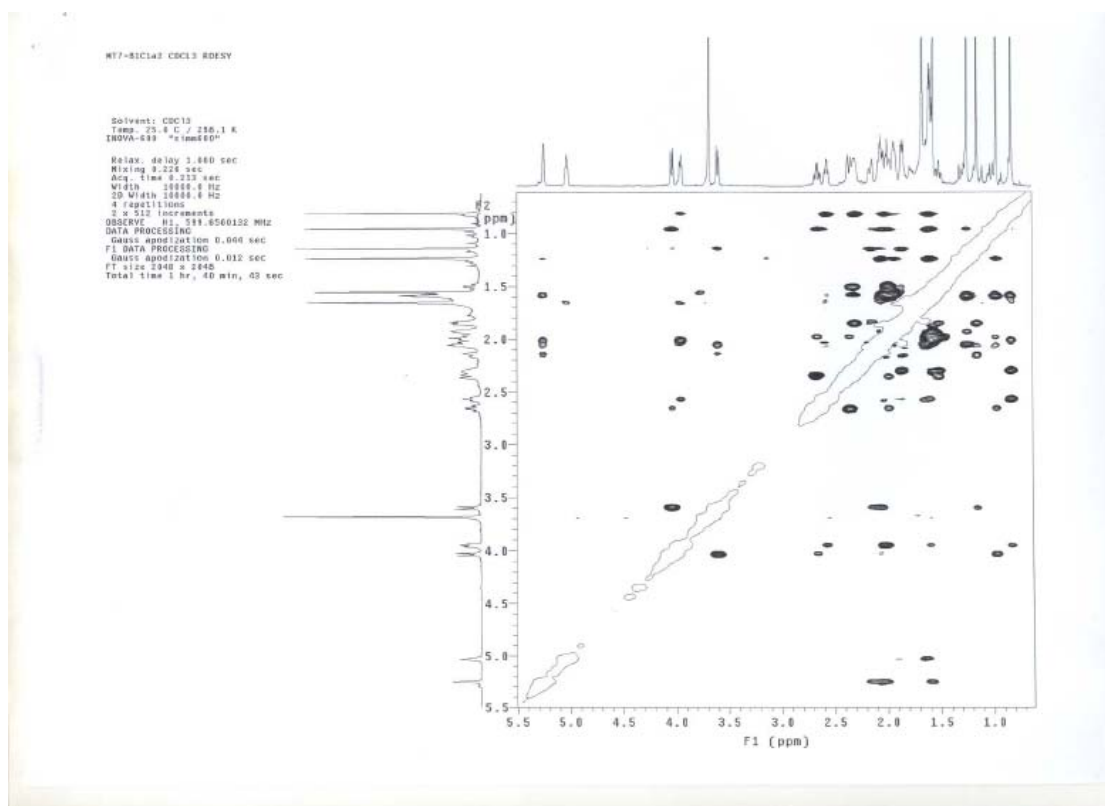

**S42. The ROESY NMR Spectrum of Compound 12 in CDCl<sub>3</sub>**



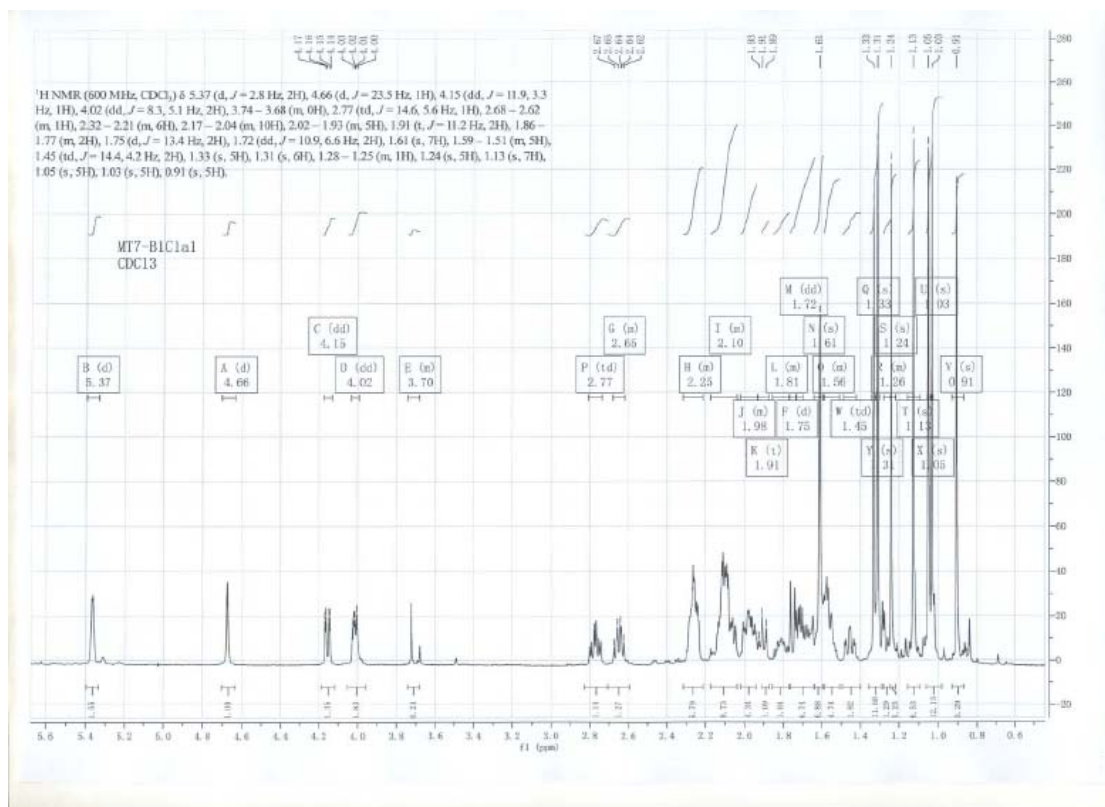

S43. The <sup>1</sup>H NMR Spectrum of Compound 13 in CDCl<sub>3</sub>

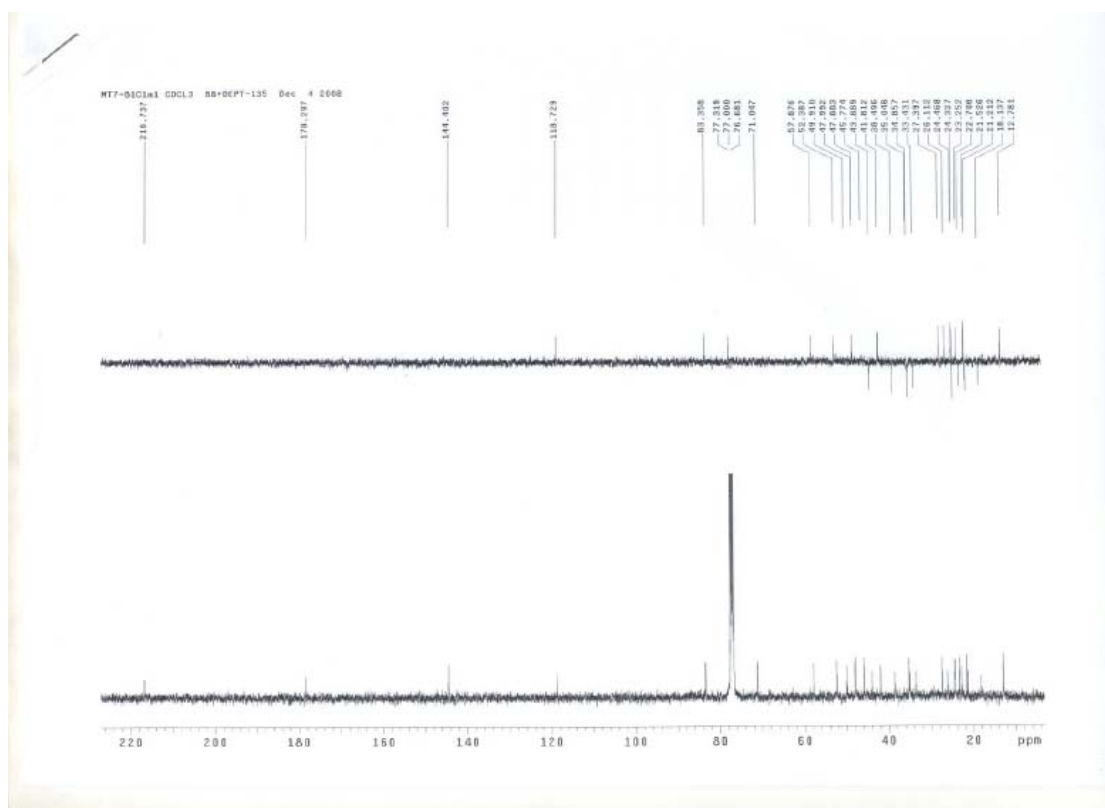

S44. The <sup>13</sup>C NMR Spectrum of Compound 13 in CDCl<sub>3</sub>

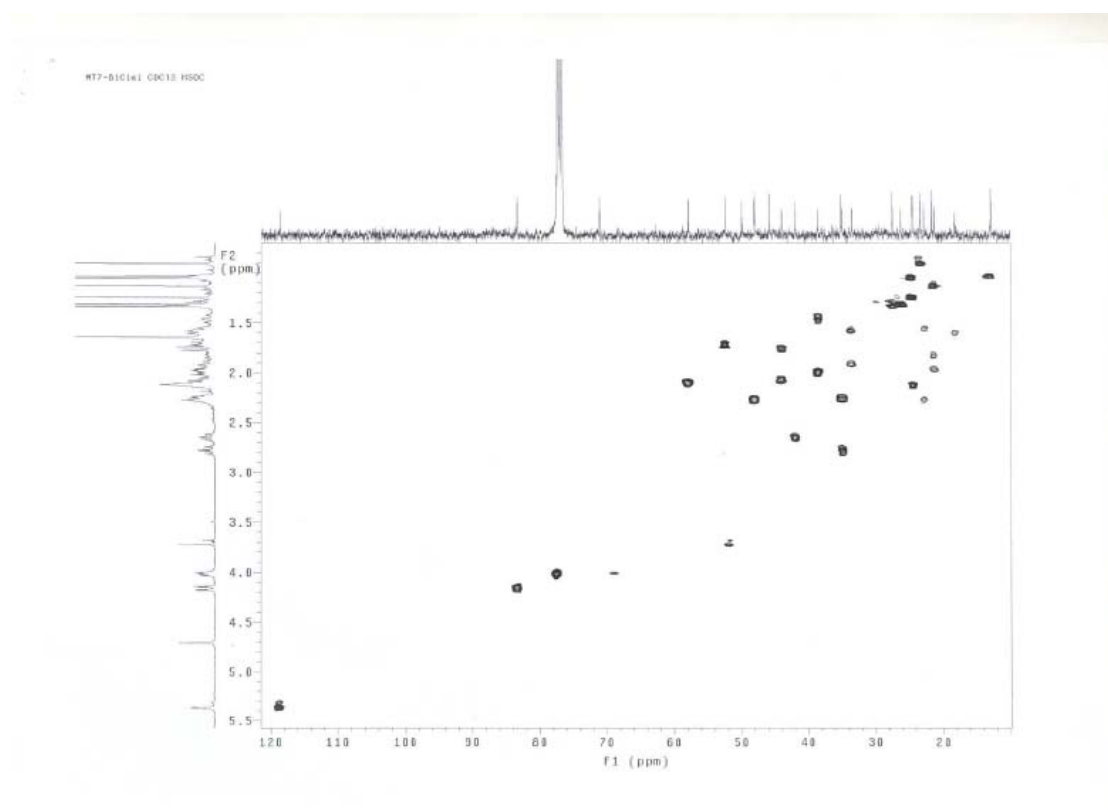

**S45. The HSQC NMR Spectrum of Compound 13 in CDCl<sub>3</sub>**

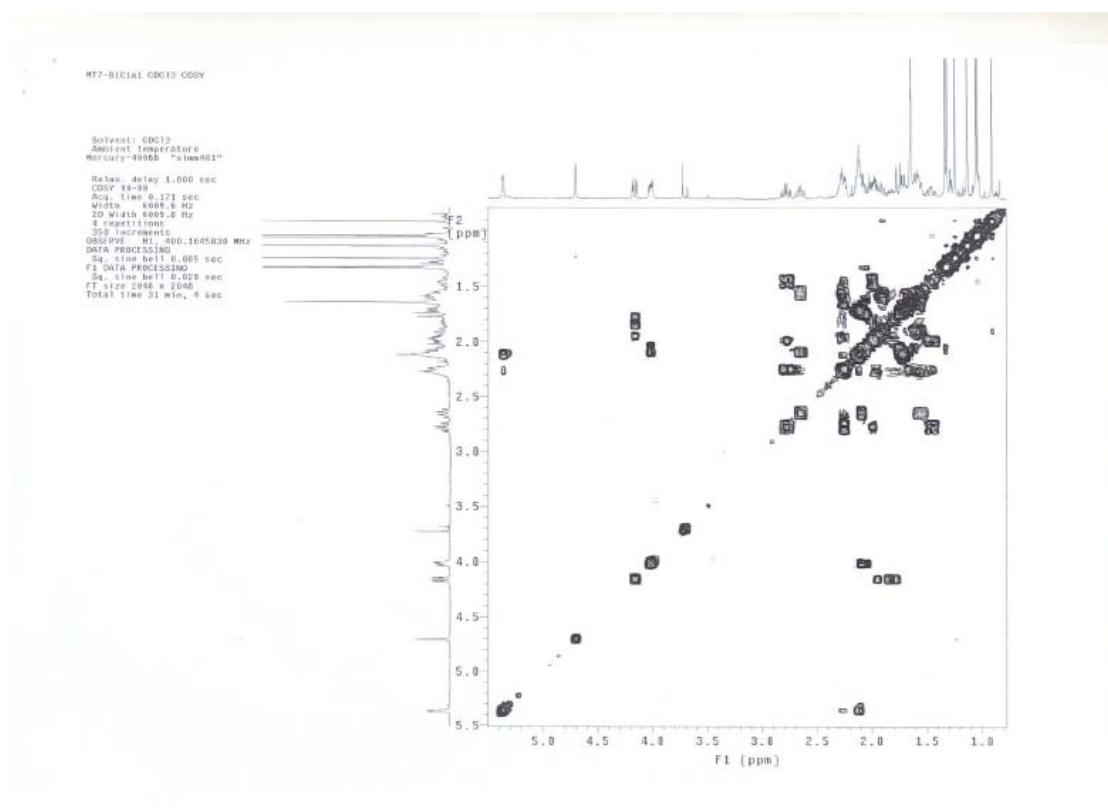

**S46. The <sup>1</sup>H-<sup>1</sup>H COSY NMR Spectrum of Compound 13 in CDCl<sub>3</sub>**

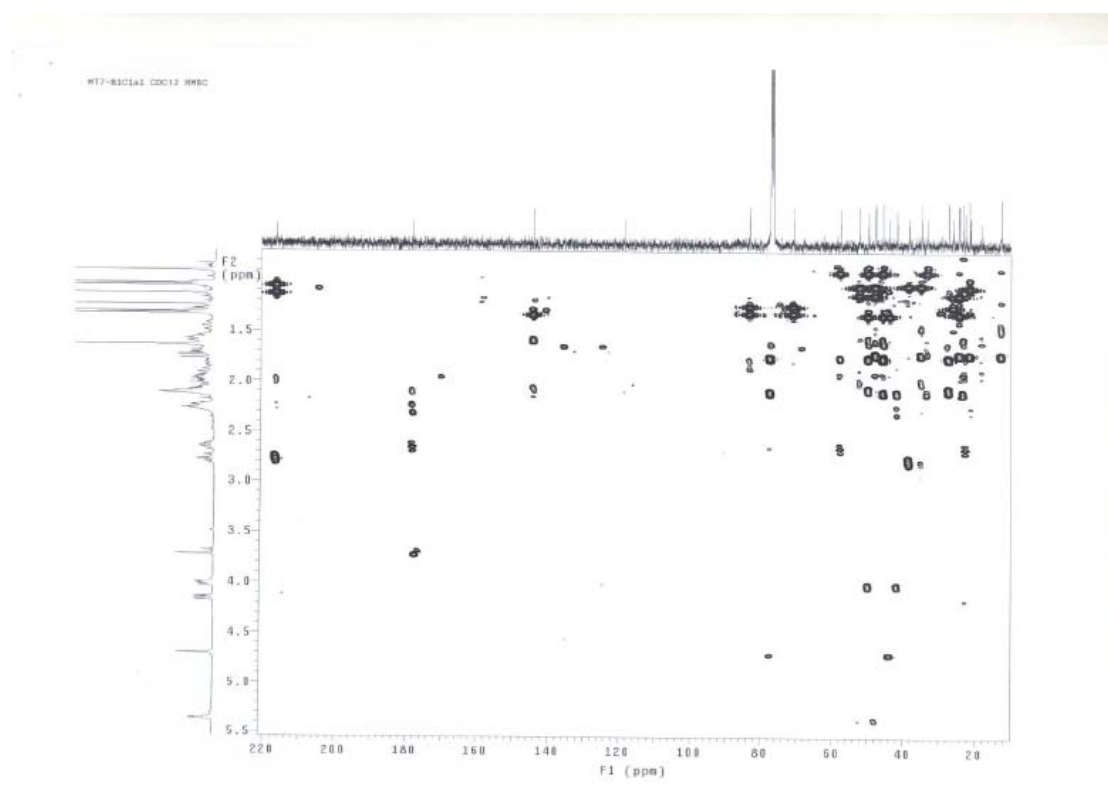

**S47. The HMBC NMR Spectrum of Compound 13 in  $\text{CDCl}_3$**

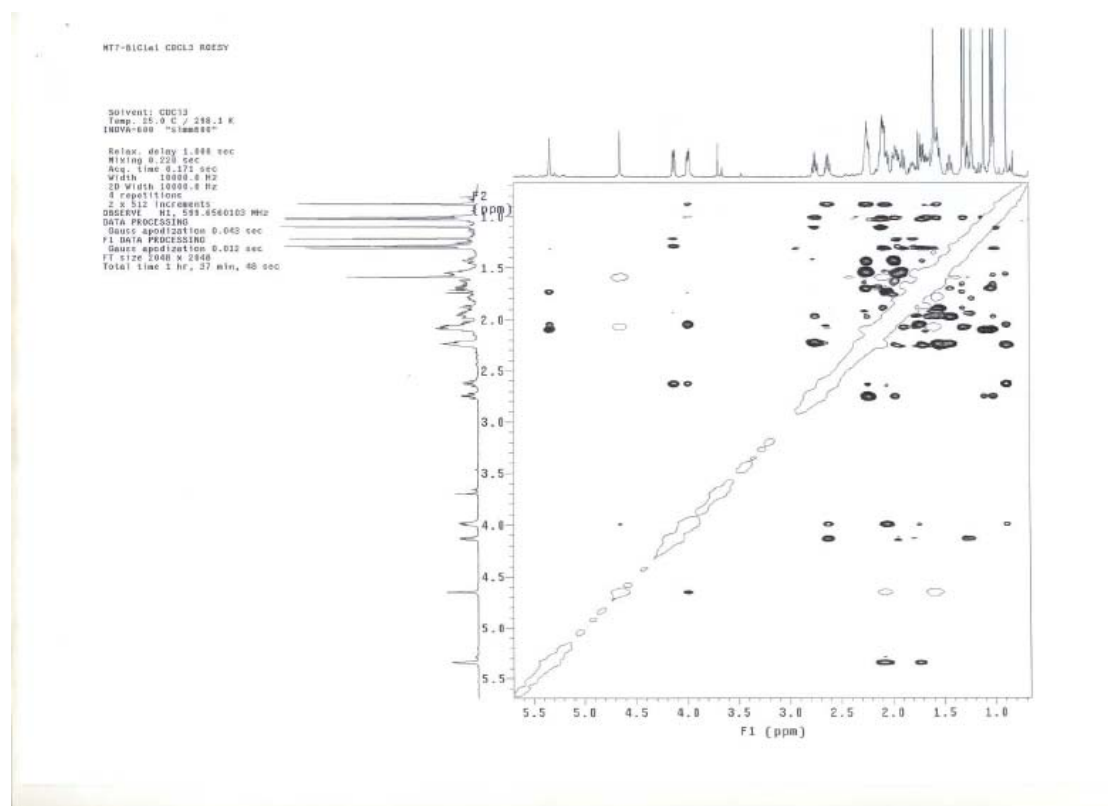

**S48. The ROESY NMR Spectrum of Compound 13 in  $\text{CDCl}_3$**

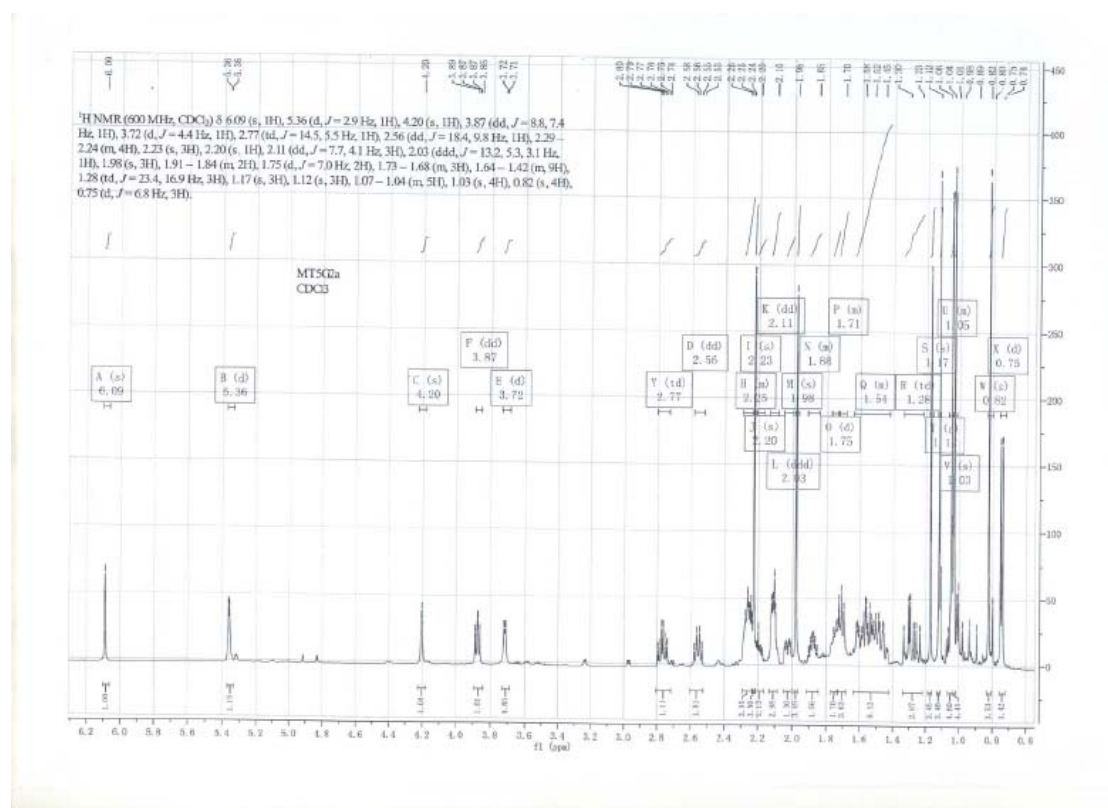

S49. The <sup>1</sup>H NMR Spectrum of Compound 14 in CDCl<sub>3</sub>

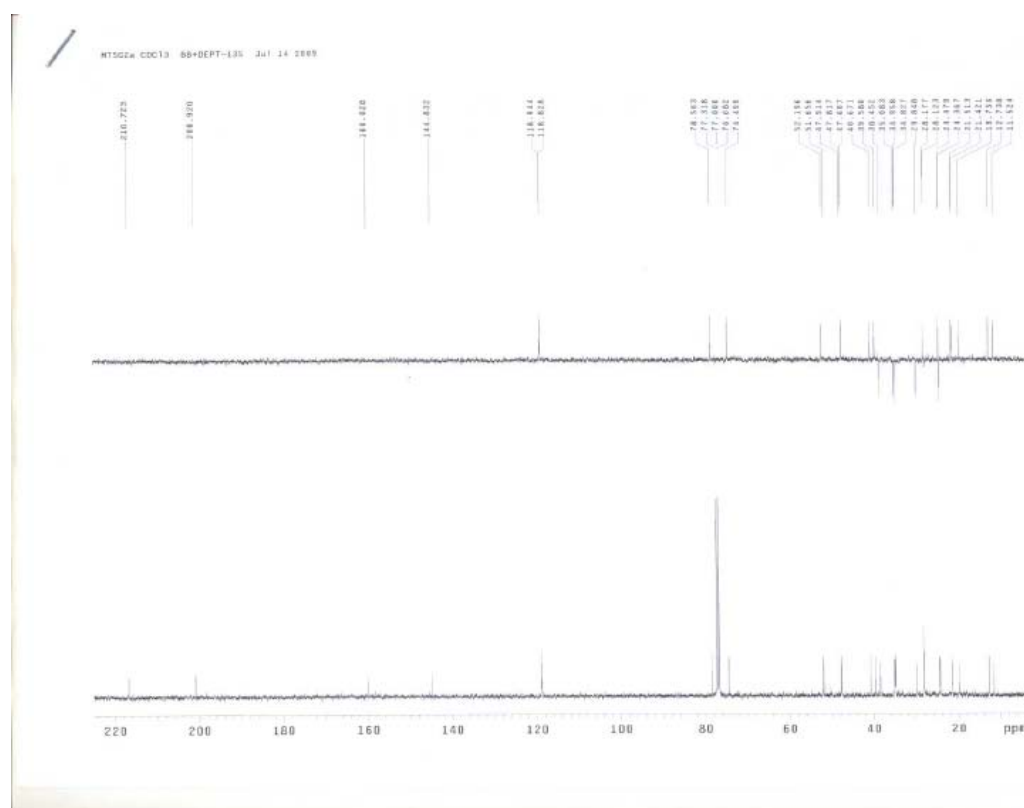

S50. The <sup>13</sup>C NMR Spectrum of Compound 14 in CDCl<sub>3</sub>

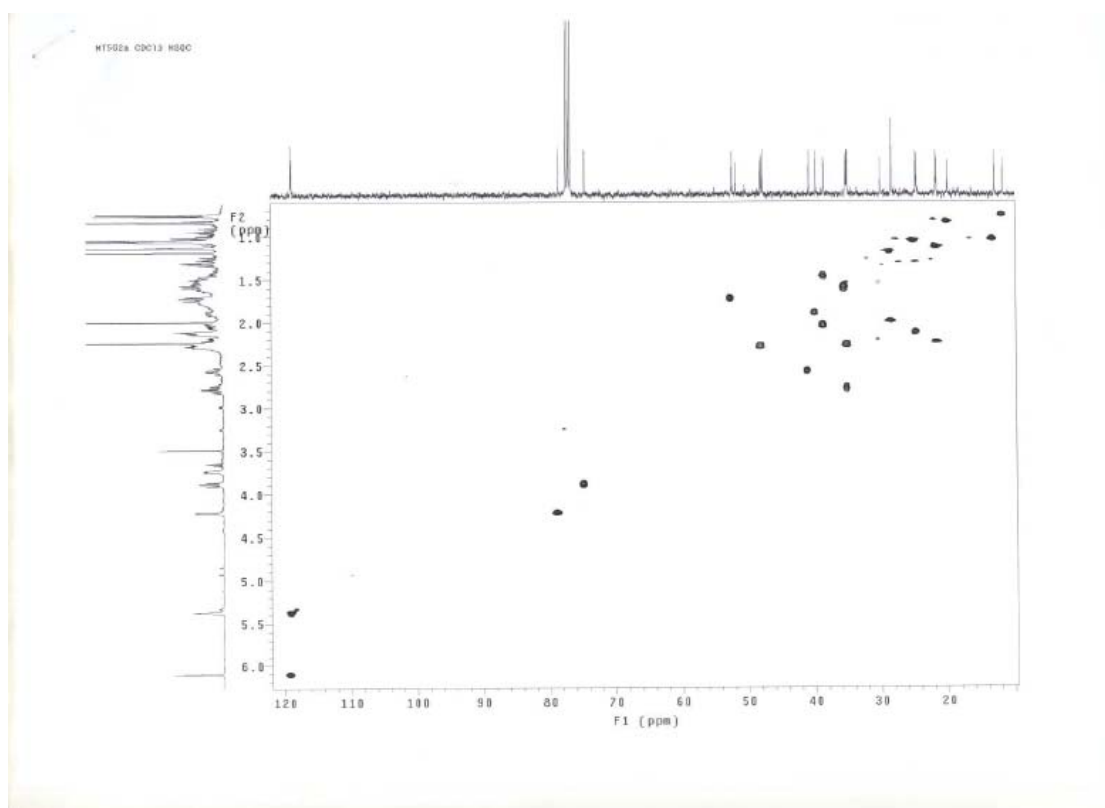

**S51. The HSQC NMR Spectrum of Compound 14 in CDCl<sub>3</sub>**

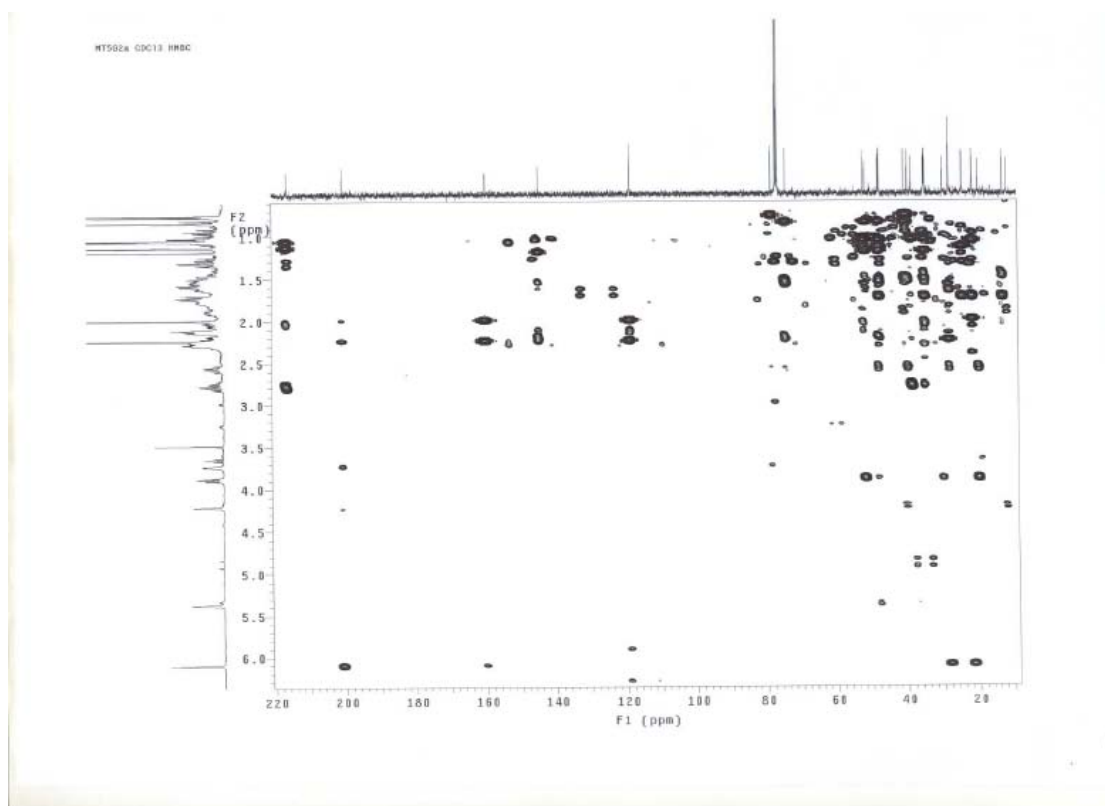

**S52. The HMBC NMR Spectrum of Compound 14 in CDCl<sub>3</sub>**

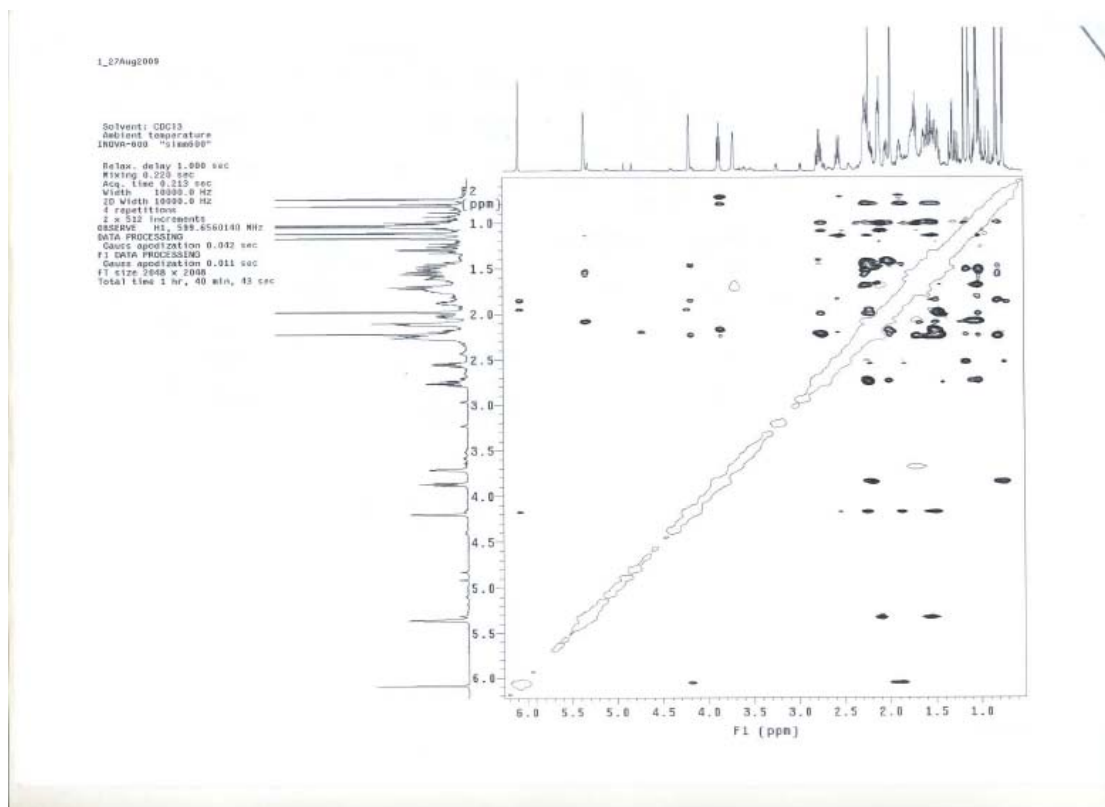

**S53. The ROESY NMR Spectrum of Compound 14 in CDCl<sub>3</sub>**

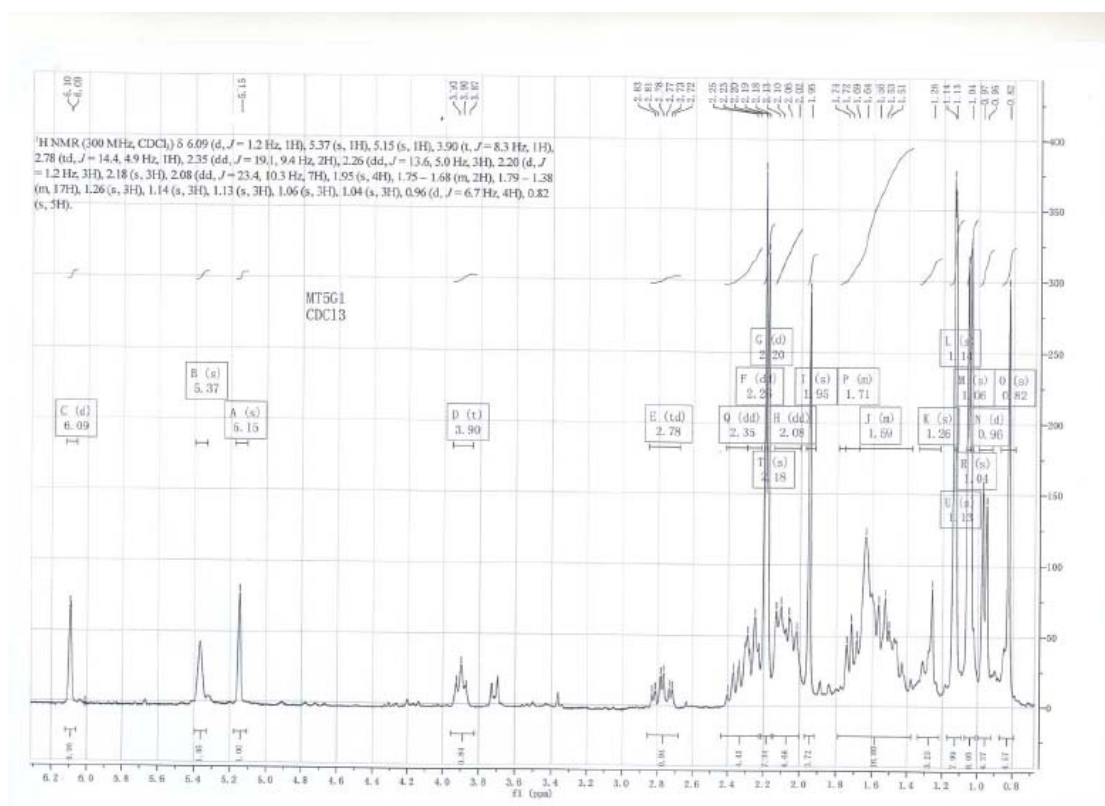

**S54. The <sup>1</sup>H NMR Spectrum of Compound 15 in CDCl<sub>3</sub>**

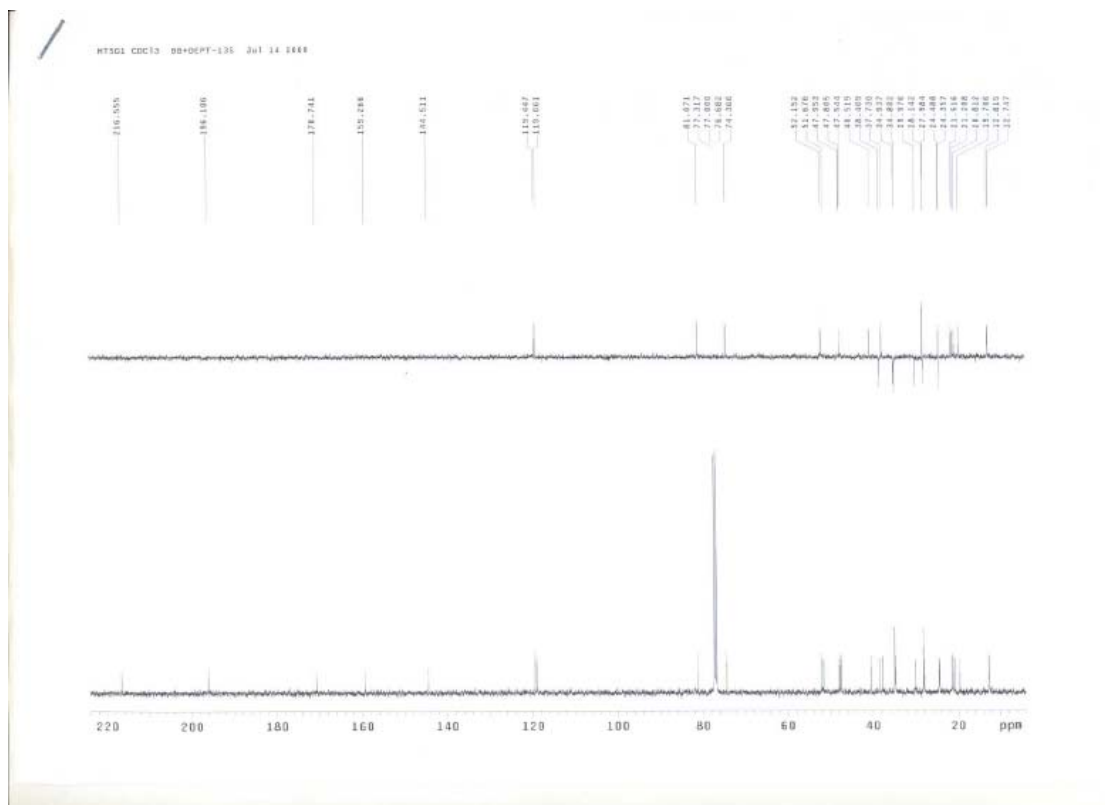

S55. The <sup>13</sup>C NMR Spectrum of Compound 15 in CDCl<sub>3</sub>

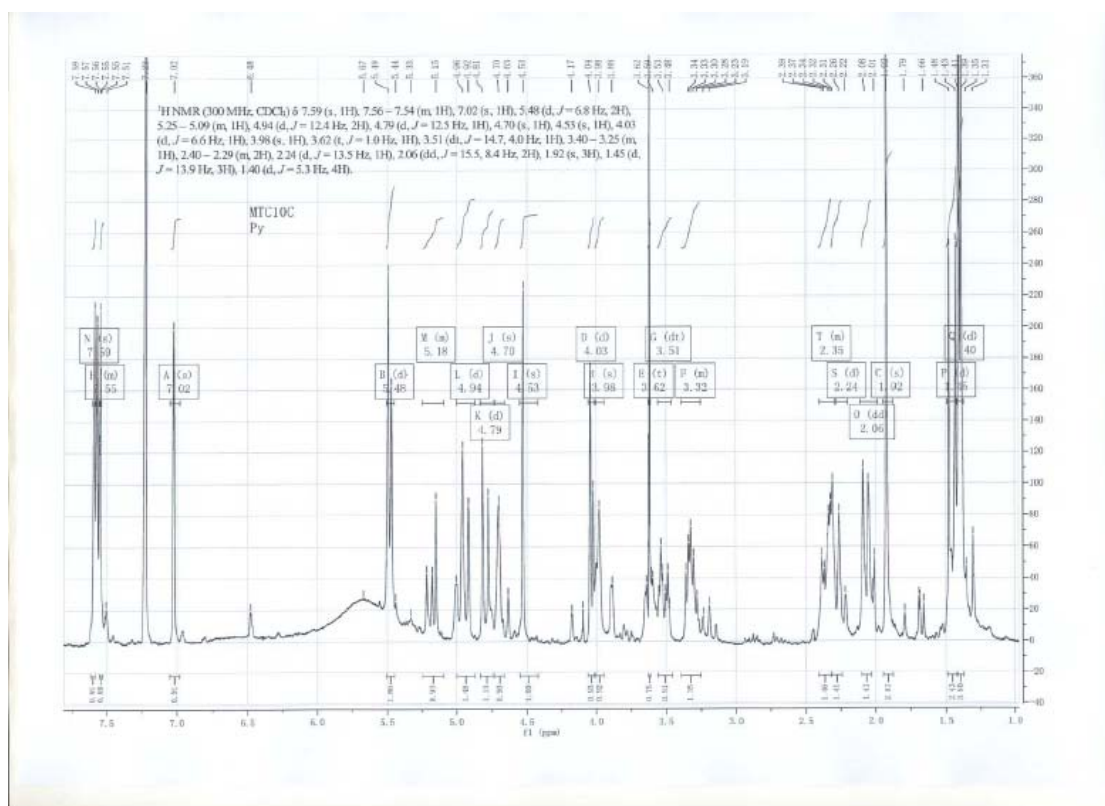

S56. The <sup>1</sup>H NMR Spectrum of Compound 5 in C<sub>5</sub>D<sub>5</sub>N

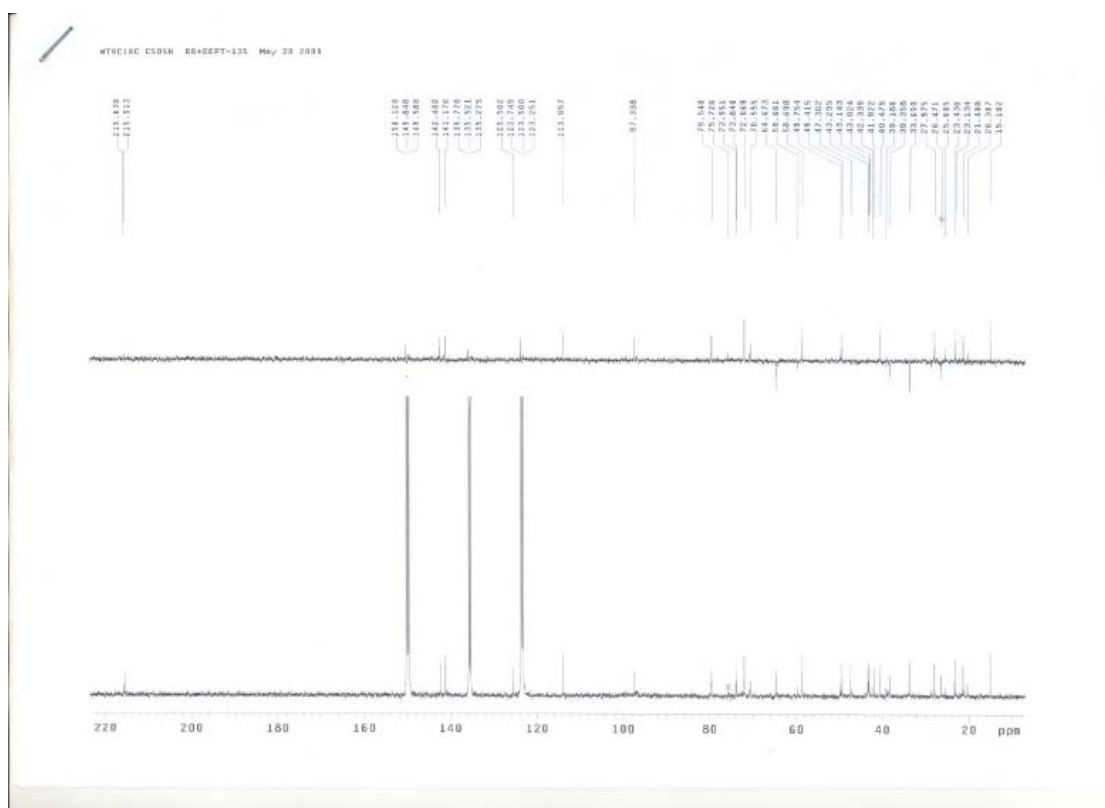

**S57. The  $^{13}\text{C}$  NMR Spectrum of Compound 5 in  $\text{C}_5\text{D}_5\text{N}$**



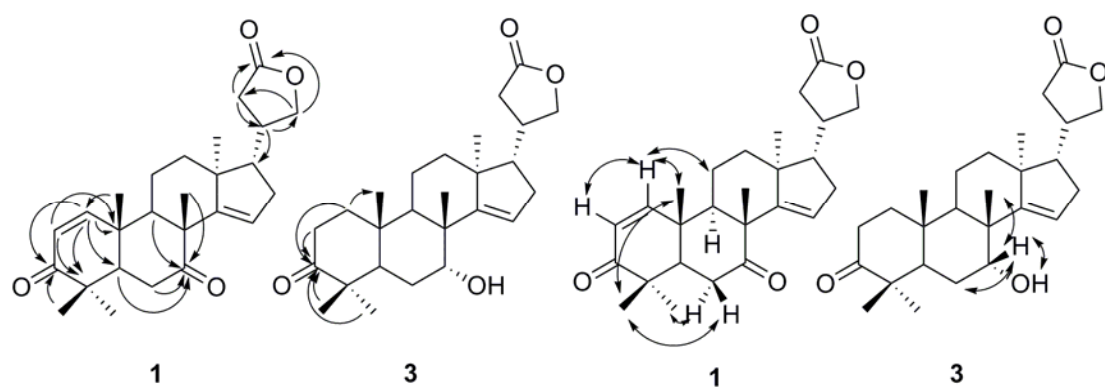

**Figure 1** Key HMBC (H→C) and ROESY (H↔H) correlations for compounds **1** and **3**.

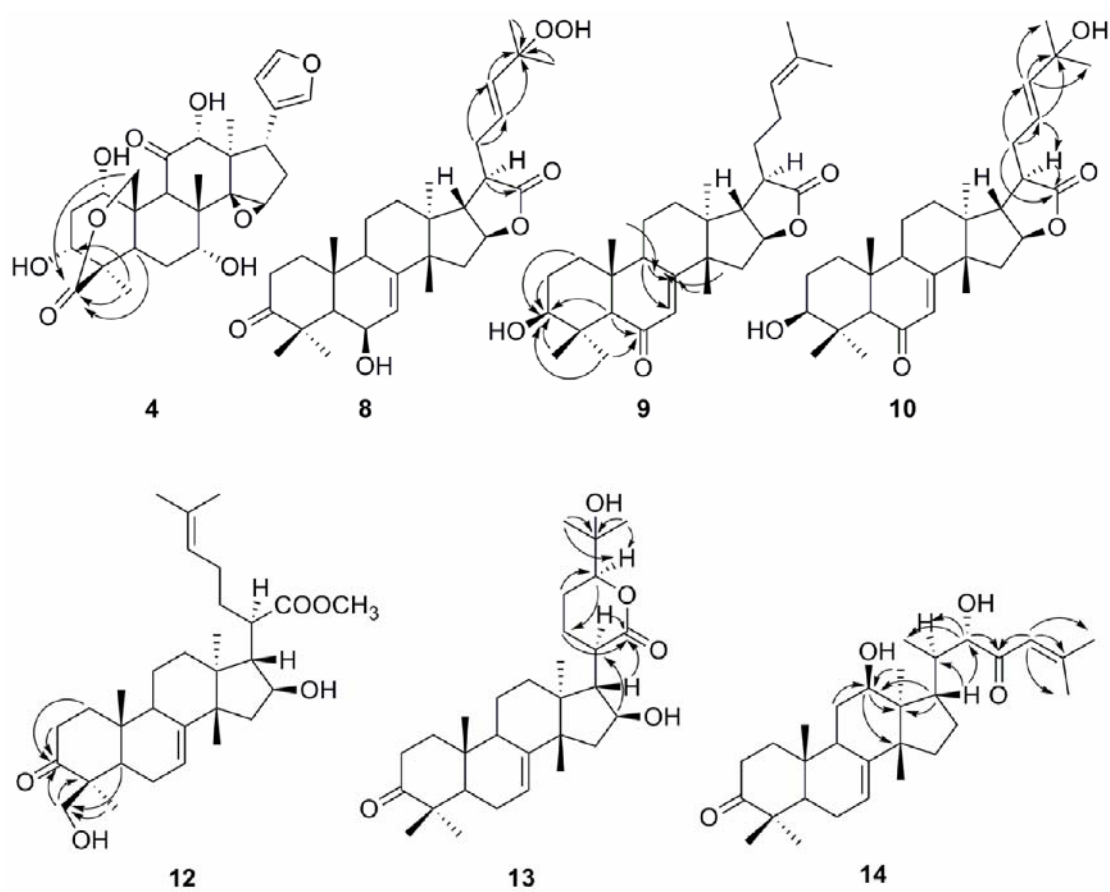

**Figure 2** Key HMBC (H→C) correlations for compounds **4**, **8**, **9**, **10**, **12**, **13** and **14**.

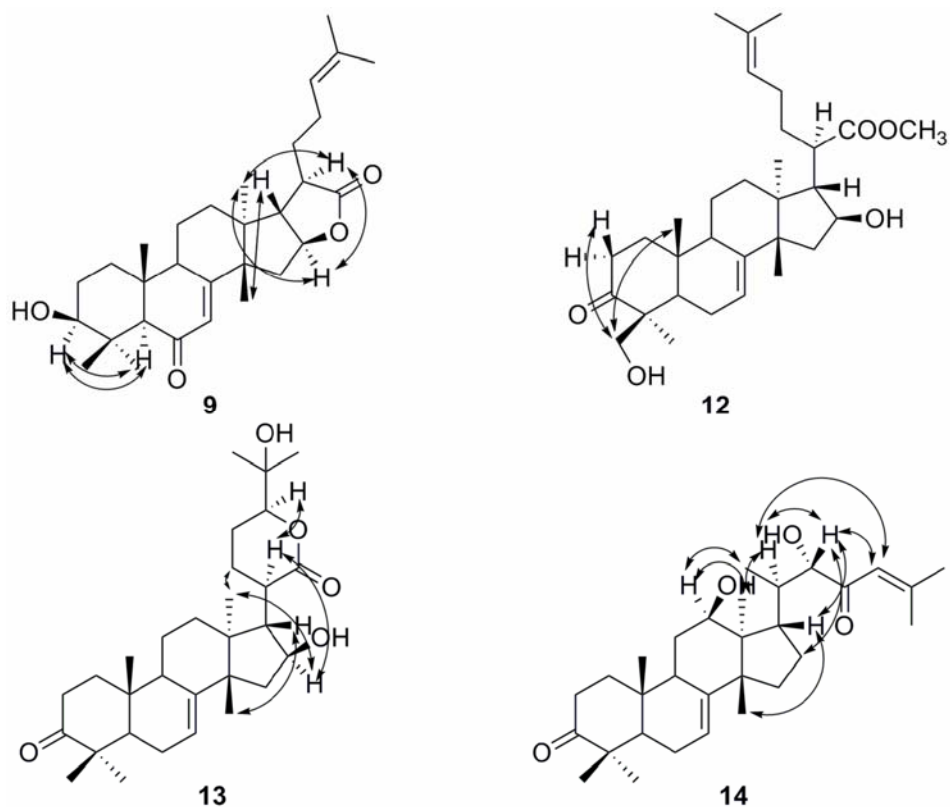

**Figure 3** Key ROESY (H $\longleftrightarrow$ H) correlations for compounds 9, 12, 13 and 14.

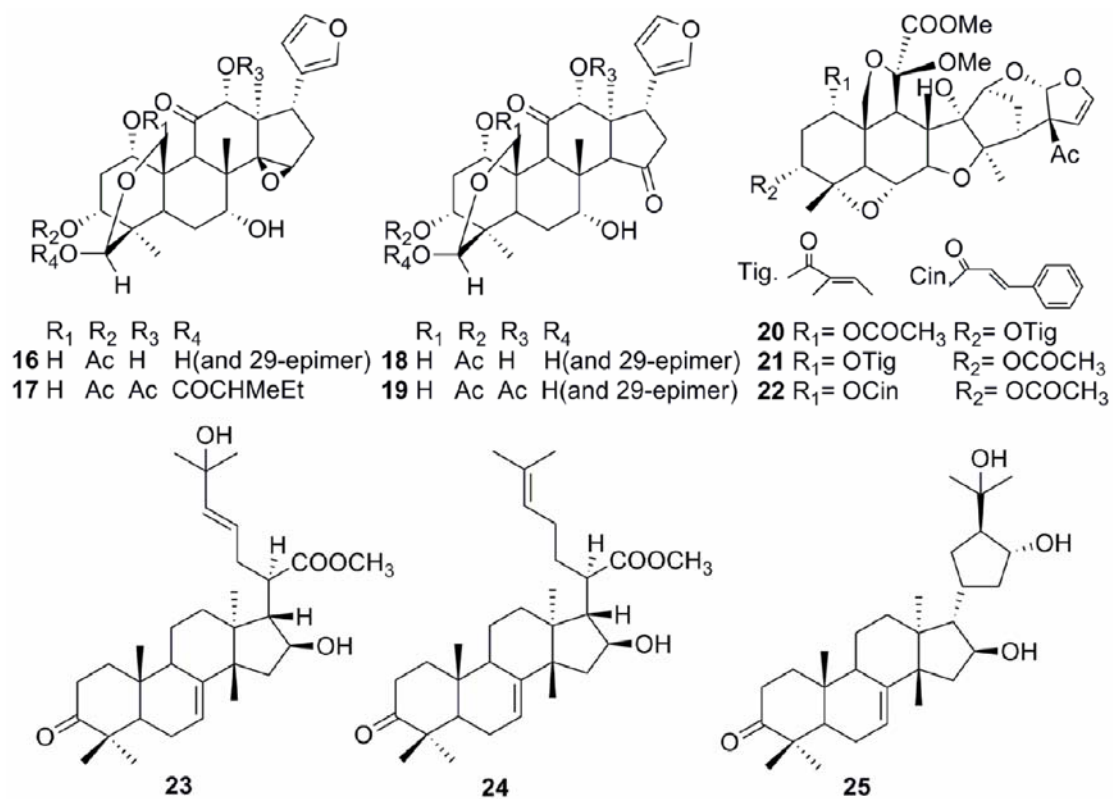

**Figure 4** Known compounds from *Melia toosendan*.
